# Supplementary material for: Potassium fluoride activation for the nucleophilic fluorination reaction using 18-crown-6, [2.2.2]-cryptand, pentaethylene glycol and comparison with the new hydro-crown scaffold: a theoretical analysis
Source: Royal Society of Chemistry journal article supplement (doi:10.1039/c8ob00418h), 2018-01-01
Supplement: c8ob00418h1.pdf [file c8ob00418h1.pdf]

## Supporting Information

### **Potassium Fluoride Activation for the Nucleophilic Fluorination Reaction Using 18-crown-6, [2.2.2]-Cryptand, Pentaethylene Glycol and Comparison with the New Hydro-crown Scaffold: A Theoretical Analysis**

Josefredo R. Pliego Jr.\*

Departamento de Ciências Naturais, Universidade Federal de São João del-Rei  
36301-160, São João del-Rei, MG, Brazil.

\* [pliego@ufsj.edu.br](mailto:pliego@ufsj.edu.br)

**Table S1:** Electronic energies and thermodynamics data for the reaction steps of the investigated systems.<sup>a</sup>

| Catalyst         | Process                                     | PBE <sup>b</sup> | M06-2X <sup>c</sup> | $\Delta\Delta G_{\text{solv}}^{\text{d}}$ | $\Delta G_{\text{g}}^{\text{e}}$ | $\Delta G_{\text{sol}}^{\text{f}}$ |
|------------------|---------------------------------------------|------------------|---------------------|-------------------------------------------|----------------------------------|------------------------------------|
|                  | CsF(s) $\rightarrow$ CsF(g)                 |                  |                     |                                           | 38.2 <sup>g</sup>                |                                    |
|                  | CsBr(s) $\rightarrow$ CsBr(g)               |                  |                     |                                           | (38) <sup>h</sup>                |                                    |
|                  | KI(s) $\rightarrow$ KI(g)                   |                  |                     |                                           | 39.4 <sup>g</sup>                |                                    |
| PentaEG          | CsF(g) + Cat $\rightarrow$ CsF-Cat          | -37.41           | -39.21              | -5.31                                     | -29.72                           | -35.03                             |
|                  | CsF-Cat + EtBr $\rightarrow$ TS1-Cat        | 10.41            | 10.69               | 5.71                                      | 20.83                            | 26.54                              |
|                  | CsF-Cat + EtBr $\rightarrow$ CsBr-Cat + EtF | -5.67            | -12.62              | 1.15                                      | -12.95                           | -11.80                             |
|                  | CsBr(g) + Cat $\rightarrow$ CsBr-Cat        | -27.52           | -31.84              | -5.69                                     | -23.72                           | -29.41                             |
| [2.2.2]-Cryptand | KF(g) + Cat $\rightarrow$ KF-Cat            | -39.98           | -43.36              | -13.60                                    | -31.47                           | -45.07                             |
|                  | KF-Cat + EtI $\rightarrow$ TS1-Cat          | -1.37            | -1.54               | 8.36                                      | 8.62                             | 16.98                              |
|                  | KF-Cat + EtI $\rightarrow$ KI-Cat + EtF     | -17.93           | -27.58              | 4.14                                      | -27.12                           | -22.98                             |
|                  | KI(g) + Cat $\rightarrow$ KI-Cat            | -42.65           | -47.53              | -7.83                                     | -36.51                           | -44.34                             |

a – Units in kcal mol<sup>-1</sup>, 1 mol L<sup>-1</sup> standard state, 298.15 K. b – Calculations at PBE/ma-def2-SVP level. c – calculations at M06-2X/ma-def2-TZVPP level. d – Solvent effect calculated with SMD model. Solvent *tert*-butanol for pentaEG and acetonitrile for the cryptand promoted reactions. e – Gas phase free energy. f - Solution phase free energy. g – Experimental data from NIST. h – Estimated value based on experimental data for CsF and CsCl.

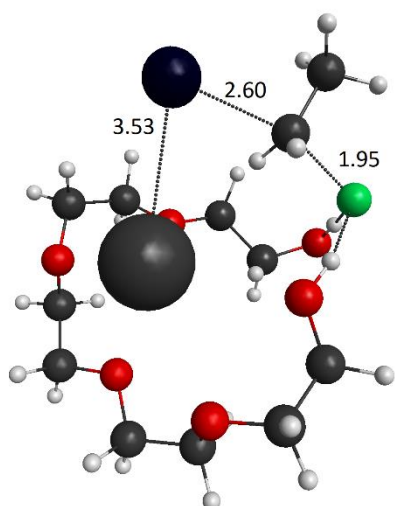

TS1-pentaEG (EtBr + CsF)

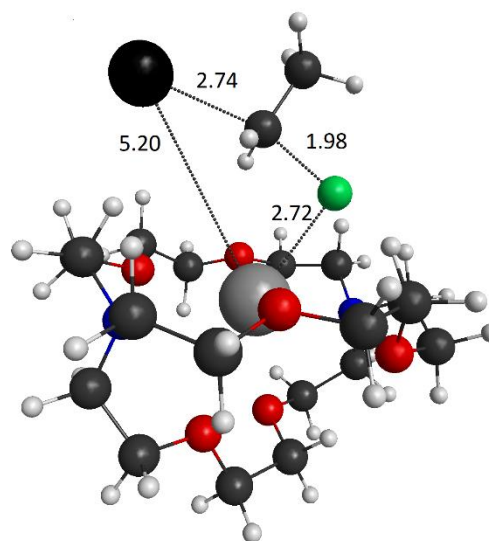

TS1-cryp (Etl + KF)

**Figure 1S:** Transition states for the reaction of ethyl bromide with CsF promoted by pentaEG and reaction of ethyl iodide with KF promoted by [2.2.2]-cryptand. Geometries obtained at PBE/def2-SVP level of theory.

Coordinates of the optimized structures obtained at PBE/ma-def2-SVP level.

EtF

8

Coordinates from ORCA-job geom-pbe

|   |                   |                  |                   |
|---|-------------------|------------------|-------------------|
| F | -4.18297512683942 | 2.12465769842300 | -0.19356357666048 |
| C | -2.77734734004502 | 2.11926653445647 | -0.18185068803257 |
| H | -2.44601727861212 | 3.17456979887284 | -0.29450553917655 |
| H | -2.44541710846215 | 1.55149591720431 | -1.07837968412569 |
| C | -2.25876127376149 | 1.50051615109574 | 1.09921678737101  |
| H | -2.60209884884352 | 2.07122199222585 | 1.98467002125942  |
| H | -1.14912141456115 | 1.50214687016814 | 1.09464452056477  |
| H | -2.60218160887512 | 0.45225503755366 | 1.20346815880009  |

EtBr

8

Coordinates from ORCA-job geom-pbe

|    |           |          |           |
|----|-----------|----------|-----------|
| Br | -4.661244 | 2.167984 | -0.286360 |
| C  | -2.688033 | 2.116952 | -0.176490 |
| H  | -2.369179 | 3.169724 | -0.288299 |
| H  | -2.367840 | 1.550848 | -1.070599 |
| C  | -2.199619 | 1.492925 | 1.115024  |
| H  | -2.543862 | 2.062903 | 2.000057  |
| H  | -1.088097 | 1.488526 | 1.119968  |
| H  | -2.546047 | 0.446268 | 1.220398  |

EtI

8

Coordinates from ORCA-job geom-pbe

|   |                   |                  |                   |
|---|-------------------|------------------|-------------------|
| I | -4.84095663629389 | 2.18710621792878 | -0.32425819651263 |
| C | -2.66672818760224 | 2.11680661469687 | -0.17644221979205 |
| H | -2.33102233880723 | 3.16572017386188 | -0.28397577947585 |
| H | -2.33052157599225 | 1.54927139592512 | -1.06482893278342 |
| C | -2.17788529425149 | 1.49058709052703 | 1.11974976167395  |
| H | -2.52504116794807 | 2.05810977742110 | 2.00607818166330  |
| H | -1.06585938344045 | 1.48456515164712 | 1.12997389341892  |
| H | -2.52590541566438 | 0.44396357799210 | 1.22740329180778  |

tri-tert-butanolamine

43

Coordinates from ORCA-job geom-pbe

|   |                   |                   |                   |
|---|-------------------|-------------------|-------------------|
| N | -3.29110364554799 | -1.60391973847607 | 0.35269078229853  |
| C | -2.32908175502393 | -0.63250260244916 | -0.14505703481675 |
| C | -4.04573253853502 | -1.24130567025977 | 1.54741984571806  |
| C | -3.90072594361314 | -2.46739180864696 | -0.65069145182155 |
| H | -2.45038139648056 | -0.48514327862753 | -1.24349203470164 |
| C | -0.82460499536664 | -0.93410980465101 | 0.13671987572616  |
| H | -2.53467886405466 | 0.36637129461886  | 0.29811527826296  |
| C | 0.02709770696493  | 0.19842530918807  | -0.45902676232581 |
| C | -0.38826865175685 | -2.28926994046940 | -0.41874334816481 |
| O | -0.59878828171618 | -1.01549921607720 | 1.55797922753425  |

|   |                   |                   |                   |
|---|-------------------|-------------------|-------------------|
| H | -3.34915615781363 | -0.71346410470479 | 2.23111125690764  |
| H | -4.32567919218695 | -2.17206950325136 | 2.08584198456977  |
| C | -5.34938541007436 | -0.38367668684546 | 1.43086194272366  |
| C | -5.12257441163562 | 0.98098210894050  | 0.76849733767264  |
| C | -5.90317050664621 | -0.19096191977524 | 2.85731258019748  |
| O | -6.33649599071142 | -1.03990776185140 | 0.62126249401420  |
| H | -3.13943674208825 | -2.63449337428596 | -1.43854257545602 |
| H | -4.78237587096644 | -1.99775307554666 | -1.15527308108250 |
| C | -4.35092658310095 | -3.88279935129637 | -0.20106451864769 |
| C | -3.28107702714279 | -4.62281679757032 | 0.60841665365144  |
| C | -4.75763647501816 | -4.68229421564065 | -1.44874609581448 |
| O | -5.53505528465595 | -3.70369247400333 | 0.62968998476179  |
| H | -6.26363931363270 | -2.01163120004701 | 0.75808695486979  |
| H | -5.89555179222008 | -4.58133713731381 | 0.85159435085972  |
| H | -0.79762985421968 | -0.14154358864409 | 1.94108050698049  |
| H | -5.20010064859524 | 0.37460918982735  | 3.50408825265526  |
| H | -6.09530330073723 | -1.17242882579662 | 3.33770375831179  |
| H | -6.86260457156176 | 0.36121541940820  | 2.81434673731884  |
| H | -3.88765237212995 | -4.87724597957928 | -2.10758427910209 |
| H | -5.52602025895941 | -4.13358911067207 | -2.02959228699515 |
| H | -5.18152445886771 | -5.66676568106962 | -1.15937320076395 |
| H | -2.39316299035798 | -4.84469077126390 | -0.01590461395160 |
| H | -3.67538981628138 | -5.59317495030654 | 0.97558180804707  |
| H | -2.95058684773878 | -4.01871431111714 | 1.47449298343256  |
| H | -0.51143540160506 | -2.32552536457632 | -1.51986895310160 |
| H | -0.99183327940862 | -3.09454544525350 | 0.03789248609966  |
| H | 0.67684650554428  | -2.47474376511364 | -0.17649314927390 |
| H | -0.08169880701787 | 0.25750371831045  | -1.56170837119898 |
| H | 1.09764593147962  | 0.03680393442223  | -0.22204426353356 |
| H | -0.27155686791033 | 1.18478458272802  | -0.04257716818472 |
| H | -4.75099955690477 | 0.86330231661352  | -0.26802928824809 |
| H | -4.40580184090074 | 1.60169415861150  | 1.34385473217589  |
| H | -6.08579244080383 | 1.52722542251353  | 0.71554066239523  |

KBr-tri-tert-butanolamine

45

Coordinates from ORCA-job geom-pbe

|   |                   |                   |                   |
|---|-------------------|-------------------|-------------------|
| N | -3.44231018355362 | -2.14746964139025 | 0.45060663287279  |
| C | -2.24726970129697 | -1.48427164840747 | -0.10023984542742 |
| C | -4.21645279420169 | -1.16431907659048 | 1.23645319729403  |
| C | -4.26785020174704 | -2.83081338044053 | -0.55652408356648 |
| H | -2.08071434016222 | -1.82202066854151 | -1.14137769389769 |
| C | -0.90277460109362 | -1.70163102355529 | 0.67495444958869  |
| H | -2.42650829225593 | -0.38320369153031 | -0.17974020406163 |
| C | 0.05668406355505  | -0.54896627462766 | 0.35000242265705  |
| C | -0.24713552693875 | -3.04451502955797 | 0.32897060262919  |
| O | -1.12192066014464 | -1.75198354755081 | 2.10745584727967  |
| H | -4.69744735633025 | -0.40930362767663 | 0.55692363182776  |
| H | -3.47178767731023 | -0.59599509261921 | 1.83068091782092  |
| C | -5.29673084046620 | -1.61389156319530 | 2.27848825421062  |
| C | -6.63956591760426 | -2.06989742363053 | 1.67459522635614  |
| C | -5.55774499919418 | -0.38085997579931 | 3.16642482119747  |
| O | -4.76284471094601 | -2.63402841353687 | 3.13220128727039  |
| H | -4.46049275726383 | -2.17256831928499 | -1.44434760697498 |
| H | -5.25239397003620 | -2.99810673414179 | -0.08902617252823 |
| C | -3.80249046317396 | -4.23669882131107 | -1.07428064617850 |

|    |                   |                   |                   |
|----|-------------------|-------------------|-------------------|
| C  | -2.71893022873656 | -4.17050396416743 | -2.15991468039026 |
| C  | -5.04833192005634 | -4.93076588145614 | -1.65745397815565 |
| O  | -3.26120628957567 | -5.02114539635897 | -0.00403203435866 |
| H  | -5.18126763192954 | -3.51803577685494 | 2.91410797520173  |
| H  | -4.01110139971007 | -5.35426150006790 | 0.57064450551886  |
| H  | -1.42760649220774 | -0.87603169977151 | 2.40707332742565  |
| K  | -2.57700575927332 | -4.08697463500709 | 2.56073162155458  |
| Br | -5.32581674269497 | -5.73011233996722 | 2.39291756590823  |
| H  | -6.98531940299049 | -1.37058509019074 | 0.88734056089265  |
| H  | -7.41081930170296 | -2.10319975289030 | 2.47028065449356  |
| H  | -6.58439445989179 | -3.09138197451637 | 1.24912042462918  |
| H  | -5.91795655755106 | 0.48294972272911  | 2.57114113432103  |
| H  | -4.63325785782728 | -0.07834287623245 | 3.69942698591439  |
| H  | -6.32374712393588 | -0.62613680621446 | 3.92687214917662  |
| H  | 0.15459699414740  | -3.02346727216509 | -0.70267567131497 |
| H  | -0.96445668620089 | -3.88830747481447 | 0.37578637847224  |
| H  | 0.59872326896697  | -3.23870374094260 | 1.01795508402155  |
| H  | 0.21800125090583  | -0.45829235053755 | -0.74322839498876 |
| H  | 1.03918417643157  | -0.70857313993193 | 0.83562584145429  |
| H  | -0.35463194165316 | 0.41964224604678  | 0.70423440837467  |
| H  | -3.04460931152230 | -3.53353117023977 | -3.00669071533647 |
| H  | -2.51961907814658 | -5.18911513790598 | -2.54646758729490 |
| H  | -1.76223958553256 | -3.77880193827595 | -1.77254909100966 |
| H  | -5.51536267580699 | -4.31503455479824 | -2.45360249473017 |
| H  | -5.80218463547540 | -5.10878042161373 | -0.86318591479226 |
| H  | -4.77157967786568 | -5.91037312046708 | -2.09396909335727 |

KF-tri-tert-butanolamine

45

Coordinates from ORCA-job geom-pbe

|   |                   |                   |                   |
|---|-------------------|-------------------|-------------------|
| N | -3.41882708620862 | -2.13400994010051 | 0.44450525416846  |
| C | -2.23657736467732 | -1.45655283702385 | -0.11199007602155 |
| C | -4.20060508614114 | -1.16845693859347 | 1.24574874672206  |
| C | -4.23960534801499 | -2.82121715535118 | -0.56514201745227 |
| H | -2.07135694508804 | -1.79498508188064 | -1.15364742462328 |
| C | -0.88271923374727 | -1.65291249071838 | 0.65120915295297  |
| H | -2.43023017867638 | -0.35731873093811 | -0.19255120777253 |
| C | 0.06150062411806  | -0.49425564699362 | 0.30150602352177  |
| C | -0.21985303132073 | -2.99418193955144 | 0.31441251973007  |
| O | -1.08254121411496 | -1.68896940596976 | 2.08720010750501  |
| H | -4.69186235650473 | -0.41028030328737 | 0.57662445687426  |
| H | -3.45997954834956 | -0.59911589090302 | 1.84546761067778  |
| C | -5.26906764590028 | -1.65228376370576 | 2.29144976425206  |
| C | -6.61993536529433 | -2.08280046199318 | 1.67821918511468  |
| C | -5.52067516305683 | -0.44231030156551 | 3.21253701702391  |
| O | -4.75276439169360 | -2.69466435283869 | 3.10816205413726  |
| H | -4.39503611090975 | -2.17949288574801 | -1.47164362175884 |
| H | -5.23837783860107 | -2.95318036187349 | -0.11803907707991 |
| C | -3.79235807010338 | -4.25180388753798 | -1.03310024087216 |
| C | -2.69463151271539 | -4.23274902571375 | -2.10694695740246 |
| C | -5.04578165400596 | -4.93155487028669 | -1.62621290920858 |
| O | -3.29717258544095 | -5.01627274695481 | 0.06081982847049  |
| H | -4.96810289367997 | -3.60665807134720 | 2.68112424718563  |
| H | -4.03518614704811 | -5.09331106846551 | 0.76723276252381  |
| H | -1.45693536971408 | -0.83427474936953 | 2.37025993106182  |
| K | -2.49924902047382 | -4.05133030788609 | 2.57098613347558  |

|   |                   |                   |                   |
|---|-------------------|-------------------|-------------------|
| F | -4.84526793893278 | -4.97128842742799 | 2.05896510709983  |
| H | -6.97288196273118 | -1.36345578840301 | 0.91185948716016  |
| H | -7.38269967438465 | -2.13986607384862 | 2.48059176887561  |
| H | -6.56244709434791 | -3.09188717656052 | 1.22615955169741  |
| H | -5.87835311075169 | 0.44044616997671  | 2.64382987241133  |
| H | -4.59137580396463 | -0.16121944861279 | 3.74946331194578  |
| H | -6.28411773068086 | -0.70462295875109 | 3.96998720173550  |
| H | 0.17241579696733  | -2.98199928654015 | -0.72087932371883 |
| H | -0.93570373971418 | -3.83848394191814 | 0.37544842636287  |
| H | 0.63270241474775  | -3.17616456771131 | 0.99867261414518  |
| H | 0.21175287344714  | -0.41659630208588 | -0.79443886105516 |
| H | 1.04995555372904  | -0.63619660241950 | 0.78044927078321  |
| H | -0.35749609037974 | 0.47394889146473  | 0.64731659583005  |
| H | -3.01304566068433 | -3.64936686127859 | -2.99435197019191 |
| H | -2.47910665271421 | -5.26952847633429 | -2.43213242021172 |
| H | -1.74795347107347 | -3.80832189198026 | -1.72889527815086 |
| H | -5.48619408870564 | -4.32946502489869 | -2.44838687331592 |
| H | -5.81772405206758 | -5.07149289014757 | -0.84233697381259 |
| H | -4.78131903039521 | -5.92913612592549 | -2.02806277079598 |

TS1-tri-tert-butanolamine

53

Coordinates from ORCA-job geom-pbe

|   |                   |                   |                   |
|---|-------------------|-------------------|-------------------|
| N | -3.26644730024512 | -2.28278648972091 | 0.50120923261953  |
| C | -2.27449182498261 | -1.47554483681536 | -0.22455202662840 |
| C | -4.05848753218240 | -1.39809746424789 | 1.37782679657889  |
| C | -4.09815017589936 | -3.12844881342554 | -0.36922778050035 |
| H | -2.12225127699245 | -1.90890169820148 | -1.23244725595606 |
| C | -0.85096603166496 | -1.32502020151646 | 0.42413600093212  |
| H | -2.68222646970556 | -0.44839434385487 | -0.40687436572120 |
| C | -0.22328092307915 | -0.00899559347295 | -0.05230888463559 |
| C | 0.07224984347687  | -2.49654646822987 | 0.07036591176608  |
| O | -0.91821004675083 | -1.33194526512926 | 1.87130303347453  |
| H | -4.70098828507554 | -0.70638258269400 | 0.76846171501983  |
| H | -3.32257366189128 | -0.74702340132531 | 1.88901361770217  |
| C | -4.95565254709661 | -1.99622727099368 | 2.52500371891636  |
| C | -6.37712573353202 | -2.39052429670540 | 2.07606444616117  |
| C | -5.07584080356685 | -0.88836802641275 | 3.58930094907817  |
| O | -4.30933906892767 | -3.10649132867233 | 3.14747288816073  |
| H | -4.28750972598905 | -2.64124584425090 | -1.35941429077599 |
| H | -5.09156807307743 | -3.20938580967712 | 0.10521971262477  |
| C | -3.61842073483637 | -4.59694155510160 | -0.61815530751149 |
| C | -2.43374758877068 | -4.68956807647480 | -1.58589973850068 |
| C | -4.81034778078582 | -5.37834653602883 | -1.20265425845527 |
| O | -3.19478086502166 | -5.19673853767774 | 0.61012721911720  |
| H | -4.74471109787564 | -3.96648712471856 | 2.87041333882451  |
| H | -3.99132278758105 | -5.35830259492062 | 1.19466412592092  |
| H | -1.21739048022831 | -0.45650690118843 | 2.17674946660494  |
| K | -1.75180136121845 | -3.89002178802877 | 2.66707565705642  |
| H | -6.85792699826414 | -1.57106906517052 | 1.50431970197228  |
| H | -7.00118400584840 | -2.60149102392838 | 2.96714606036427  |
| H | -6.39142621402723 | -3.30683862857542 | 1.45410219760951  |
| H | -5.47143822110477 | 0.05265023211067  | 3.15578699637683  |
| H | -4.08460146522540 | -0.67767912839924 | 4.03943849632356  |
| H | -5.75587076802378 | -1.21205570220253 | 4.40095339384380  |

|    |                   |                   |                   |
|----|-------------------|-------------------|-------------------|
| H  | 0.28706944104237  | -2.51210277585366 | -1.01614915454120 |
| H  | -0.38086847029927 | -3.47429993491910 | 0.32325328859622  |
| H  | 1.03335167082361  | -2.40263174870432 | 0.61240888264802  |
| H  | -0.18582914934667 | 0.03632949091293  | -1.15931173129196 |
| H  | 0.80902162349472  | 0.09901978137841  | 0.33519202654758  |
| H  | -0.82086097714767 | 0.86175321404693  | 0.29214001773599  |
| H  | -2.67865929549814 | -4.22448949244188 | -2.56204448046839 |
| H  | -2.17693413678072 | -5.75221631625638 | -1.76285645461601 |
| H  | -1.53376162399354 | -4.19695779466369 | -1.17881505517332 |
| H  | -5.17836628481879 | -4.91371446125412 | -2.14019896644826 |
| H  | -5.65323612561449 | -5.41591178419373 | -0.48203470188789 |
| H  | -4.50800512375067 | -6.41955629092918 | -1.42811059761695 |
| H  | -3.77307146353313 | -8.28185601834215 | 4.42803552454456  |
| H  | -3.07323611171428 | -6.44933319258994 | 2.84863061270955  |
| C  | -4.45946389726713 | -7.42293983728504 | 4.29944564935494  |
| Br | -1.36599356287308 | -6.26414325158885 | 4.91011614568677  |
| C  | -3.74074068638988 | -6.26547845796322 | 3.69556829427145  |
| H  | -5.26485304621797 | -7.73544582282982 | 3.60217065380707  |
| F  | -5.03761627095847 | -5.53741255357890 | 2.48690726475601  |
| H  | -4.91062079117850 | -7.17254031805971 | 5.27635455900380  |
| H  | -3.72246571198470 | -5.29992626923382 | 4.20511745401839  |

pentaEG

38

Coordinates from ORCA-job geom-pbe

|   |                   |                   |                   |
|---|-------------------|-------------------|-------------------|
| O | -1.36787086140797 | -1.59454708138037 | -0.31710536410333 |
| C | -2.64463719494228 | -1.24558526213544 | 0.18285883311900  |
| H | -2.71994103618580 | -1.49263092794121 | 1.27005069098699  |
| H | -3.44721881333799 | -1.81389369351156 | -0.35021422252768 |
| C | -2.88279852137568 | 0.23827586022304  | -0.01863537730861 |
| O | -2.04658902938688 | 0.96892867066810  | 0.85855804778506  |
| H | -3.96114175382577 | 0.45672115985029  | 0.18853804704490  |
| H | -2.67502959828313 | 0.49482901424480  | -1.08312401040287 |
| C | -1.01828082869155 | -2.94662699043437 | -0.11193274601729 |
| C | 0.42878544757580  | -3.14693862430337 | -0.51868548004341 |
| H | -1.66585326754022 | -3.62938748103960 | -0.71744195950153 |
| H | -1.14465967281690 | -3.23145630334819 | 0.96135372235714  |
| H | 0.58691156439586  | -2.72586719605662 | -1.53973781966971 |
| H | 0.65642867566503  | -4.24013734284615 | -0.55985469091081 |
| O | 1.26513209708188  | -2.49152580231107 | 0.41909657859014  |
| C | -2.20764343957006 | 2.37481891878373  | 0.82998126204647  |
| H | -3.23347868336736 | 2.67356467318619  | 1.16777728636994  |
| C | -1.96515807722796 | 3.03945296646617  | -0.53721086978981 |
| H | -1.49473244370941 | 2.75953971191182  | 1.58737655733540  |
| H | -2.82213062050352 | 2.85669930850913  | -1.21805662392128 |
| O | -0.83133122822948 | 2.57529843400401  | -1.23653838115627 |
| H | -1.91796518123447 | 4.14529068480088  | -0.36160456421439 |
| C | 2.59804682293934  | -2.24864110895393 | -0.00258693368399 |
| C | 0.41143517822534  | 2.72130204519523  | -0.56386863562974 |
| C | 1.51764083850961  | 2.18487740124900  | -1.47790579579463 |
| H | 1.19840119587880  | 1.18142307687837  | -1.84908589762750 |
| O | 2.77002953744654  | 2.14047453523142  | -0.82385557738186 |
| H | 1.62504103627781  | 2.84106528357242  | -2.36652329988666 |
| H | 0.41975292824764  | 2.14081102277907  | 0.38789386371997  |
| H | 0.60349638629111  | 3.79205098422770  | -0.30654460873294 |
| H | 2.71668920616760  | 1.42017956670141  | -0.15081132803147 |



|   |                  |                   |                   |
|---|------------------|-------------------|-------------------|
| C | 3.15486970883923 | -1.19582790899650 | 0.94495412508598  |
| H | 2.60409796627110 | -1.86397861647795 | -1.05108340888325 |
| H | 3.21778935880048 | -3.17781022150797 | 0.03064573169058  |
| H | 4.17513342514680 | -0.89720205141536 | 0.63093745575956  |
| H | 3.22039342176690 | -1.61678411571743 | 1.97515040517942  |
| O | 2.34063511561176 | -0.02724780910268 | 0.94076098190780  |
| H | 1.40989034049773 | -0.33817478100304 | 0.97399400624069  |

KBr-pentaEG

40

Coordinates from ORCA-job geom-pbe

|    |                   |                   |                   |
|----|-------------------|-------------------|-------------------|
| O  | 2.32323935719504  | 0.88597539060040  | -0.48783777190507 |
| C  | 3.12941136042388  | 0.22795138492443  | 0.47918029641851  |
| H  | 2.93370996184433  | 0.64515055122482  | 1.49636007044731  |
| H  | 4.21336479731479  | 0.37399988506972  | 0.25259690045893  |
| C  | 2.82828832861520  | -1.25705482176742 | 0.46354454543357  |
| O  | 1.49878719521790  | -1.47360272186246 | 0.91508105640689  |
| H  | 3.55459390429241  | -1.77777146301548 | 1.13267308127480  |
| H  | 2.97812916739214  | -1.65074851916700 | -0.56962669353178 |
| C  | 2.56418327996068  | 2.28459559153380  | -0.58260499656400 |
| C  | 1.57166010943765  | 2.88794929910303  | -1.56885211439593 |
| H  | 3.60505110972246  | 2.47903515452708  | -0.94167725568888 |
| H  | 2.46597958450597  | 2.76142995435110  | 0.42208226377358  |
| H  | 1.64124553552608  | 2.34297576713484  | -2.53340196323803 |
| H  | 1.84852043408919  | 3.95003944407206  | -1.76400976671075 |
| O  | 0.22298078585708  | 2.77781080856109  | -1.13763986832704 |
| C  | 1.08722577851800  | -2.84173847198563 | 0.94854850125657  |
| H  | 1.90371098831653  | -3.48595199270577 | 1.35450422231408  |
| C  | 0.64860621239738  | -3.37285326487518 | -0.41905799622128 |
| H  | 0.24250844660856  | -2.88277382987804 | 1.66694077462609  |
| H  | 1.47427813204588  | -3.27729173091310 | -1.15662304122723 |
| O  | -0.45670499115808 | -2.67781281520185 | -0.97196969825762 |
| H  | 0.42188210319484  | -4.46234757249128 | -0.32000914159272 |
| C  | -0.22218906201056 | 3.82943941007233  | -0.27180499548338 |
| C  | -1.74452618389541 | -3.05435047374344 | -0.45358139951808 |
| C  | -2.82473443016962 | -2.60431429122025 | -1.44689225366881 |
| H  | -2.58120562820499 | -1.56731415914335 | -1.78462917030324 |
| O  | -4.11018796370435 | -2.67648164516109 | -0.88119178159913 |
| H  | -2.80569861559246 | -3.25249592942694 | -2.34847978165896 |
| H  | -1.94411318824800 | -2.56375460715805 | 0.52831784759318  |
| H  | -1.78471212046225 | -4.15789626773621 | -0.30203648205407 |
| H  | -4.20621821619950 | -1.87792626505881 | -0.30247256442968 |
| Br | -3.51325393970275 | 0.18110197559795  | 0.74211869841668  |
| K  | -0.46835765116658 | 0.16771128182795  | -0.29677225275927 |
| C  | -1.51315516663400 | 3.41413173183909  | 0.40771474372983  |
| H  | -0.38108501417200 | 4.76146508126553  | -0.86454241303213 |
| H  | 0.54481914433510  | 4.04256446593139  | 0.50783554773012  |
| H  | -2.26245113864478 | 3.11227910807225  | -0.36102150645220 |
| H  | -1.92498381803162 | 4.30998876757665  | 0.93315266369673  |
| O  | -1.25349425237802 | 2.35377371582302  | 1.30927061351357  |
| H  | -2.08287433643610 | 1.79746207340277  | 1.37987308152885  |

KF-pentaEG

40

Coordinates from ORCA-job geom-pbe

|   |                   |                   |                   |
|---|-------------------|-------------------|-------------------|
| O | 2.49582120127521  | 0.84187918504194  | -0.34228046950948 |
| C | 3.39280245981847  | -0.01662027674874 | 0.34711197768644  |
| H | 3.38969119269225  | 0.21275340450902  | 1.44007573837602  |
| H | 4.43620103988148  | 0.12524781811245  | -0.02569991446621 |
| C | 2.98339908318467  | -1.45953116644005 | 0.13063978989097  |
| O | 1.76167690673221  | -1.70938682999120 | 0.81386378584353  |
| H | 3.78765947536064  | -2.12619176213051 | 0.52503909089482  |
| H | 2.88844600235768  | -1.65258873682391 | -0.96347444303051 |
| C | 2.70901294662175  | 2.22120944559723  | -0.06590779761518 |
| C | 1.73047739472633  | 3.06855490003163  | -0.86080884559241 |
| H | 3.75084191059319  | 2.51978528649614  | -0.33791751121158 |
| H | 2.57539257488221  | 2.41329804212148  | 1.02695598199557  |
| H | 1.92811994077786  | 2.97334268328798  | -1.95600814404849 |
| H | 1.90247706051525  | 4.13385756283112  | -0.57838257227461 |
| O | 0.40694908399455  | 2.67031996074796  | -0.56068061736016 |
| C | 1.28607610310439  | -3.05413653682466 | 0.73750603476268  |
| H | 2.11677026927142  | -3.77385972968410 | 0.93483816892304  |
| C | 0.62633295668864  | -3.40197296519787 | -0.60171929690781 |
| H | 0.55600177093121  | -3.15712386160154 | 1.56672948853532  |
| H | 1.35854564161650  | -3.30923399037656 | -1.43235673143399 |
| O | -0.46143864237378 | -2.56524239374449 | -0.94359075904496 |
| H | 0.31117523715156  | -4.47358211257086 | -0.56259728673801 |
| C | -0.59225841098417 | 3.69017227683508  | -0.65303989216239 |
| C | -1.69902945330115 | -2.83011657429532 | -0.26227816881445 |
| C | -2.85099389139126 | -2.16516453405830 | -1.04377497433257 |
| H | -2.41825689230665 | -1.27280282862172 | -1.56377600281275 |
| O | -3.93032454879310 | -1.82767162781008 | -0.22411851633641 |
| H | -3.20565644991531 | -2.85153675194436 | -1.84423971860287 |
| H | -1.69097085237968 | -2.40328853071463 | 0.76831218129069  |
| H | -1.84648151557073 | -3.93135551700860 | -0.16552864083190 |
| H | -3.63075881832879 | -1.00054003796866 | 0.27696310450416  |
| F | -2.72454198216965 | 0.19280796242867  | 0.80514922340520  |
| K | -0.29414175545190 | 0.17220546707046  | 0.20235372215855  |
| C | -1.95106115890182 | 3.08308733661289  | -0.32345008128821 |
| H | -0.61014359398086 | 4.12741888487253  | -1.67992346719611 |
| H | -0.35283908672480 | 4.50397218633403  | 0.07231793898603  |
| H | -2.18426970189256 | 2.29075526791288  | -1.07859290701346 |
| H | -2.71371711406174 | 3.88870557226081  | -0.47863222916774 |
| O | -1.97351812926688 | 2.57396179648650  | 0.98149451386819  |
| H | -2.44288825438261 | 1.66171172496537  | 0.97713824667104  |

TS1-pentaEG (KF)

48

Coordinates from ORCA-job geom-pbe

|   |                  |                   |                   |
|---|------------------|-------------------|-------------------|
| O | 2.47120885280593 | 0.74543842933190  | -0.06616272834607 |
| C | 3.45844162801509 | -0.07785126864311 | 0.54162058240833  |
| H | 3.57650277094035 | 0.18530967233890  | 1.62066107017422  |
| H | 4.44957450029923 | 0.06262002629774  | 0.04720245613193  |
| C | 3.03280749283529 | -1.52846326448136 | 0.41313847021153  |
| O | 1.86490125160280 | -1.72240451310780 | 1.19530007107794  |
| H | 3.86053750910686 | -2.18773659905825 | 0.77026772958602  |
| H | 2.85170276104697 | -1.75917338590635 | -0.66242393655131 |
| C | 2.67744056429444 | 2.13716113584000  | 0.11724929781391  |
| C | 1.60703087041358 | 2.91340790356997  | -0.63095025826719 |
| H | 3.67862430513449 | 2.44930049356572  | -0.26801188889964 |
| H | 2.64602801951639 | 2.39175354900602  | 1.20588921189516  |

|    |                   |                   |                   |
|----|-------------------|-------------------|-------------------|
| H  | 1.70968847492200  | 2.75302752593903  | -1.73152573160318 |
| H  | 1.76533800862685  | 3.99999152135983  | -0.42735337619649 |
| O  | 0.32719750285585  | 2.49096175428449  | -0.19425565742126 |
| C  | 1.22434733645100  | -2.99545467265528 | 1.08530357600630  |
| H  | 1.97081066718842  | -3.82032721390516 | 1.18184986602666  |
| C  | 0.44688219158647  | -3.16761977213634 | -0.22352805886283 |
| H  | 0.54189194945055  | -3.04978898368236 | 1.95933740664866  |
| H  | 1.13410692914114  | -3.09313018600578 | -1.09485551920132 |
| O  | -0.55692828754631 | -2.18072122677222 | -0.41840330429092 |
| H  | 0.00786654713372  | -4.19223606840534 | -0.24407960931384 |
| C  | -0.75767220972986 | 3.34091386740986  | -0.57613718422753 |
| C  | -1.88759318652118 | -2.51624640022381 | -0.00678461856302 |
| C  | -2.85578272279161 | -1.57662224498068 | -0.74445895713936 |
| H  | -2.44177180731455 | -0.54082730681786 | -0.69417342308026 |
| O  | -4.16111470755102 | -1.64704342826080 | -0.22826899348307 |
| H  | -2.86235004418944 | -1.85212252502420 | -1.82368913166101 |
| H  | -2.00554112699274 | -2.40708580533660 | 1.09884791294028  |
| H  | -2.11195185997675 | -3.57899053189157 | -0.25572059882049 |
| H  | -4.32779124298504 | -0.82959845041653 | 0.31878721979251  |
| K  | -0.11649543844439 | 0.18720491553289  | 1.22826512858498  |
| C  | -2.05813131604423 | 2.55196023598437  | -0.53161949676988 |
| H  | -0.60620232614150 | 3.72567122187381  | -1.61129821249153 |
| H  | -0.80246334344063 | 4.21307021539644  | 0.11808384404845  |
| H  | -2.03579867106678 | 1.77733935055999  | -1.33995102044594 |
| H  | -2.88759896326321 | 3.25648726069304  | -0.77891596655387 |
| O  | -2.21590323028586 | 1.96660736753881  | 0.74079004858961  |
| H  | -3.11685295196352 | 1.51484615911646  | 0.83765387385410  |
| H  | -3.01085814170441 | -0.94803626993630 | 2.14906637318902  |
| Br | -1.20730738884133 | -1.04555429592909 | 4.07309809287618  |
| F  | -4.29057216441049 | 0.55543992077981  | 1.27810815205273  |
| C  | -3.31791699373669 | -0.13601430944286 | 2.80798050699915  |
| C  | -4.40249646442534 | -0.34249086043197 | 3.80933911897215  |
| H  | -4.65154530486412 | -1.41124514016178 | 3.93857214977931  |
| H  | -5.30646382711039 | 0.18900269266116  | 3.44439146150475  |
| H  | -4.12784034157237 | 0.08890604739732  | 4.79034792910600  |
| H  | -2.73641607045367 | 0.79017345713579  | 2.82087612192011  |

CsBr-pentaEG

40

Coordinates from ORCA-job geom-pbe

|   |                  |                   |                   |
|---|------------------|-------------------|-------------------|
| O | 2.46663925431224 | 0.83565912830640  | -0.24706687351681 |
| C | 3.40303235151546 | -0.03895836297805 | 0.36270388190966  |
| H | 3.45448520090170 | 0.14138668697188  | 1.46495929443146  |
| H | 4.42654018063406 | 0.13524239570196  | -0.05103005611361 |
| C | 3.01372680286021 | -1.47983408379460 | 0.09862409848121  |
| O | 1.85197984253294 | -1.81123885508745 | 0.84834402161954  |
| H | 3.86383163963451 | -2.14178094529601 | 0.39476712082149  |
| H | 2.84432653493898 | -1.61064881340950 | -0.99530926255286 |
| C | 2.74542614214498 | 2.20865205917969  | -0.01705841772248 |
| C | 1.77906459810978 | 3.08536068280536  | -0.79123123339431 |
| H | 3.78505170222864 | 2.45782420348626  | -0.34297869668397 |
| H | 2.67453127857081 | 2.43989143543163  | 1.07507644123009  |
| H | 1.88641837001914 | 2.90331248747559  | -1.88865309357792 |
| H | 2.06349401073810 | 4.14805568887244  | -0.59654394507800 |
| O | 0.45091321400200 | 2.83315678932825  | -0.37466700972615 |
| C | 1.37777843760689 | -3.14496078879907 | 0.66430021892266  |

|    |                   |                   |                   |
|----|-------------------|-------------------|-------------------|
| H  | 2.22045721593591  | -3.87358552805669 | 0.75115015629973  |
| C  | 0.65463307770638  | -3.37666040925330 | -0.66735891895796 |
| H  | 0.68878188627710  | -3.33601746874146 | 1.51307563475708  |
| H  | 1.33485458431729  | -3.15736698069672 | -1.51790647068533 |
| O  | -0.48801334144017 | -2.56435239614684 | -0.85736819381565 |
| H  | 0.38952101974519  | -4.46036891459009 | -0.73132700563604 |
| C  | -0.48132881117497 | 3.86116567521075  | -0.71660318100922 |
| C  | -1.70069655381557 | -3.01859108494025 | -0.24877582972637 |
| C  | -2.88373854688459 | -2.37771716137046 | -0.98979714090608 |
| H  | -2.66099259659697 | -1.29506230086753 | -1.13958909160113 |
| O  | -4.09195866018211 | -2.55929695314860 | -0.29372168761643 |
| H  | -2.96686930234469 | -2.83569446501328 | -2.00062045444205 |
| H  | -1.75105543952555 | -2.73660513703316 | 0.83297961717047  |
| H  | -1.76379072524829 | -4.13172241052772 | -0.29523030696143 |
| H  | -4.26403163856170 | -1.71901762968512 | 0.20475420935650  |
| Br | -3.98953956204853 | 0.49166751042526  | 1.02014778869857  |
| Cs | -0.54226910034700 | 0.28042928228669  | 1.04681490423963  |
| C  | -1.89919730298784 | 3.38404040301368  | -0.45560544559370 |
| H  | -0.38419864516364 | 4.12798459667121  | -1.79560972828686 |
| H  | -0.26177435505574 | 4.77456515240542  | -0.11323897518285 |
| H  | -2.11488951064202 | 2.49529474201119  | -1.09737212527626 |
| H  | -2.59105140992659 | 4.19464854255038  | -0.79333467512622 |
| O  | -2.06839725994817 | 3.08087080186145  | 0.91259666201515  |
| H  | -2.84946458283812 | 2.46262242544043  | 1.00076376923645  |

CsF-pentaEG

40

Coordinates from ORCA-job geom-pbe

|   |                   |                   |                   |
|---|-------------------|-------------------|-------------------|
| O | 2.32317360124880  | 0.79115143118347  | -0.25955608511149 |
| C | 3.32137525742087  | -0.10183117754925 | 0.20267791142295  |
| H | 3.54181855586535  | 0.07321549780548  | 1.28552307729543  |
| H | 4.27535878486423  | 0.05011835378230  | -0.35936052810557 |
| C | 2.85922933318611  | -1.53078795360414 | -0.00662237683756 |
| O | 1.79274457181253  | -1.82419692819909 | 0.88440474469429  |
| H | 3.72201004894394  | -2.21683039829291 | 0.17897084433478  |
| H | 2.54236327175601  | -1.65237033691217 | -1.06716954883894 |
| C | 2.65667928240623  | 2.16163831174630  | -0.11645865726745 |
| C | 1.58715186515719  | 3.01964726897398  | -0.76692473508910 |
| H | 3.63827137782617  | 2.38540630081825  | -0.60122002345767 |
| H | 2.75491453244126  | 2.42812100963156  | 0.96628555027841  |
| H | 1.52817773825094  | 2.78502115079202  | -1.85788173251290 |
| H | 1.89764598465459  | 4.08989744590724  | -0.66907678251794 |
| O | 0.34251758140189  | 2.78535128181174  | -0.14276426297987 |
| C | 1.30947387038633  | -3.16369511537177 | 0.83811548548391  |
| H | 2.12209690370078  | -3.88453537153072 | 1.10628898595421  |
| C | 0.71520192524235  | -3.59479898612982 | -0.51293149552311 |
| H | 0.54479001068474  | -3.22332651388955 | 1.63973878253165  |
| H | 1.51794587022262  | -3.69121179905377 | -1.27459142381143 |
| O | -0.22736415561446 | -2.70093953528503 | -1.05526941226910 |
| H | 0.28387257554355  | -4.61825739737602 | -0.37189113510098 |
| C | -0.72420616510153 | 3.621173308606278 | -0.61151131774329 |
| C | -1.50369709566614 | -2.67420585188298 | -0.41907744429357 |
| C | -2.43511171784734 | -1.73993427834056 | -1.20628779014219 |
| H | -1.88312618313486 | -0.78289498983464 | -1.38769469831437 |
| O | -3.65360189424965 | -1.54030595175176 | -0.54878430779468 |
| H | -2.62774783603052 | -2.18743974230749 | -2.20693833989409 |

|    |                   |                   |                   |
|----|-------------------|-------------------|-------------------|
| H  | -1.43346514529898 | -2.30234623973390 | 0.63292930626667  |
| H  | -1.93582842084691 | -3.70287811849121 | -0.36801623188339 |
| H  | -3.49485773056341 | -0.82991299490380 | 0.15438031118179  |
| F  | -2.93908594770288 | 0.27821379815640  | 1.13171487342104  |
| Cs | -0.26078515452428 | 0.46712191426272  | 1.82058420287888  |
| C  | -2.06633917790194 | 2.93681128852411  | -0.39244258337545 |
| H  | -0.59805398374219 | 3.82398652303578  | -1.70113053733054 |
| H  | -0.68803012062098 | 4.59713026842944  | -0.07236784499905 |
| H  | -2.07897768643609 | 1.98722110787245  | -0.97971657128044 |
| H  | -2.84487486088116 | 3.60228033813610  | -0.84669786228962 |
| O  | -2.31350999814686 | 2.69523952925731  | 0.96867728531224  |
| H  | -2.74756966870630 | 1.76705377425113  | 1.04980236770755  |

TS1-pentaEG (CsF)

48

Coordinates from ORCA-job geom-pbe

|    |                   |                   |                   |
|----|-------------------|-------------------|-------------------|
| O  | 2.12092128367001  | 0.55517450683244  | -0.28673067372772 |
| C  | 3.23824583750372  | -0.30193153309700 | -0.11224190771379 |
| H  | 3.90926897533926  | 0.08022062487652  | 0.69686695258200  |
| H  | 3.84282284714499  | -0.35335442496741 | -1.05102565345893 |
| C  | 2.75245527598728  | -1.69951082929758 | 0.22347992598996  |
| O  | 2.13584058976265  | -1.68450930954605 | 1.50111295175813  |
| H  | 3.62253571710319  | -2.40060341783800 | 0.21087054100057  |
| H  | 2.03420686499948  | -2.02044920204356 | -0.56388460855109 |
| C  | 2.44027163460326  | 1.84022619014558  | -0.79625275119953 |
| C  | 1.16638242687426  | 2.63280854726806  | -1.01864756087510 |
| H  | 2.97708782202653  | 1.74902381375101  | -1.77255662298212 |
| H  | 3.11205476662349  | 2.39218059269372  | -0.09363418939914 |
| H  | 0.45702377073425  | 2.01616696347431  | -1.62065750721999 |
| H  | 1.41384113877930  | 3.54371109656106  | -1.61775920720490 |
| O  | 0.60348589209523  | 3.00520261334706  | 0.22960973454306  |
| C  | 1.40059628578603  | -2.85064667193340 | 1.86692852442476  |
| H  | 2.07606511059939  | -3.73503227229675 | 1.96377795368770  |
| C  | 0.25761095589180  | -3.20654719775593 | 0.91469240594345  |
| H  | 0.98521083852352  | -2.62841997029501 | 2.87109956989796  |
| H  | 0.63212529031744  | -3.69810321381334 | -0.01833365646901 |
| O  | -0.45705302508589 | -2.03266522676283 | 0.58689598440778  |
| H  | -0.38843380714859 | -3.95398369077215 | 1.43594500945514  |
| C  | -0.60156364428637 | 3.77318458727281  | 0.13618905601014  |
| C  | -1.66186632120731 | -2.25121482850765 | -0.14827972048076 |
| C  | -2.04096867505109 | -0.93781166152635 | -0.85843092400155 |
| H  | -1.65470873655418 | -0.10020402184033 | -0.23099808729850 |
| O  | -3.42096999131904 | -0.81420567528734 | -1.09998308118742 |
| H  | -1.50550414976885 | -0.87806067279362 | -1.83167578907311 |
| H  | -2.48361524036240 | -2.55563425260436 | 0.54277172554667  |
| H  | -1.52446191946999 | -3.07991950414623 | -0.88206231456544 |
| H  | -3.81563032183738 | -0.36902522330913 | -0.30119341279453 |
| Cs | 0.26745575398746  | 0.64376483103899  | 2.42064404778500  |
| C  | -1.86837846734070 | 2.94006474939027  | -0.02934008713949 |
| H  | -0.52189239434677 | 4.51014641843689  | -0.69844628210224 |
| H  | -0.66902431691315 | 4.33969674060794  | 1.08822194771628  |
| H  | -1.80713420388230 | 2.32037737659405  | -0.95880095295193 |
| H  | -2.71390759240521 | 3.65403051129909  | -0.18328585170532 |
| O  | -2.05730303234065 | 2.14085428643734  | 1.11707059018138  |
| H  | -2.91764417995305 | 1.61026986313695  | 1.05138353695563  |
| H  | -2.70771860286710 | -0.89429588850515 | 2.05529251575197  |

|    |                   |                   |                  |
|----|-------------------|-------------------|------------------|
| Br | -1.77386936028488 | -1.36288277693282 | 4.48727567962875 |
| F  | -4.06422031490178 | 0.53444481524250  | 1.13635826960023 |
| C  | -3.43044570069074 | -0.41394376767020 | 2.71551513079882 |
| C  | -4.68415792950466 | -1.11068742129760 | 3.12750532877255 |
| H  | -4.66263685171863 | -2.18694681061347 | 2.87503753188307 |
| H  | -5.53016431274854 | -0.63564155261282 | 2.58855126693783 |
| H  | -4.86453547006425 | -0.99965206470191 | 4.21356789512526 |
| H  | -3.17412551629906 | 0.55414495436139  | 3.15701476571753 |

18C6

42

Coordinates from ORCA-job geom-pbe E -921.221055026178

|   |           |           |           |
|---|-----------|-----------|-----------|
| O | -2.574374 | -0.623683 | -2.858662 |
| C | -3.883925 | -0.849880 | -2.382656 |
| C | -3.888525 | -2.002867 | -1.397695 |
| O | -3.358480 | -1.582660 | -0.158202 |
| O | -1.164364 | -1.966061 | 1.809122  |
| C | -0.475133 | -1.385717 | 2.896901  |
| C | 0.974983  | -1.145740 | 2.524806  |
| O | 1.078303  | -0.019819 | 1.679400  |
| C | 2.387783  | 0.206756  | 1.203395  |
| C | 2.391845  | 1.359058  | 0.217653  |
| O | 1.862074  | 0.937743  | -1.021628 |
| C | 1.736656  | 1.981793  | -1.964003 |
| C | 1.054369  | 1.470946  | -3.218309 |
| O | -0.331026 | 1.321624  | -2.989824 |
| C | -1.021084 | 0.741564  | -4.077168 |
| C | -2.471084 | 0.502122  | -3.704226 |
| H | -4.940635 | -2.366555 | -1.274533 |
| H | -3.291479 | -2.848268 | -1.818643 |
| H | -0.943485 | -0.415012 | 3.191277  |
| H | -0.511069 | -2.058738 | 3.791686  |
| H | 1.381556  | -2.057666 | 2.022529  |
| H | 1.568015  | -0.992127 | 3.462800  |
| H | 3.443801  | 1.723114  | 0.094268  |
| H | 1.794390  | 2.204521  | 0.637883  |
| H | 1.515166  | 0.497403  | -3.515107 |
| H | 1.241081  | 2.196891  | -4.050915 |
| H | -0.985420 | 1.414525  | -4.972013 |
| H | -0.553368 | -0.229372 | -4.371817 |
| H | -3.064742 | 0.348657  | -4.641842 |
| H | -2.876987 | 1.414310  | -3.201854 |
| H | -4.575710 | -1.095337 | -3.229156 |
| H | -4.286763 | 0.063416  | -1.880543 |
| H | 1.142496  | 2.828914  | -1.542069 |
| H | 2.743616  | 2.386064  | -2.241698 |
| H | 3.079319  | 0.453293  | 2.049795  |
| H | 2.791169  | -0.706701 | 0.702053  |
| C | -2.549564 | -2.117386 | 2.037652  |
| C | -3.231378 | -2.627663 | 0.782857  |
| H | -3.011632 | -1.144802 | 2.335603  |
| H | -2.735140 | -2.844543 | 2.869449  |
| H | -4.237657 | -3.033853 | 1.060264  |
| H | -2.636032 | -3.473346 | 0.359669  |

KBr-18C6

44

Coordinates from ORCA-job geom-pbe E -4094.453685716042

|    |           |           |           |
|----|-----------|-----------|-----------|
| O  | -2.557700 | -0.554485 | -2.787899 |
| C  | -3.860392 | -0.912129 | -2.338788 |
| C  | -3.771149 | -2.144091 | -1.458786 |
| O  | -3.021956 | -1.817421 | -0.306799 |
| O  | -1.145701 | -1.896441 | 1.843265  |
| C  | -0.535960 | -1.179342 | 2.912404  |
| C  | 0.944707  | -1.032936 | 2.628905  |
| O  | 1.127821  | -0.137129 | 1.540224  |
| C  | 2.472515  | 0.044571  | 1.144688  |
| C  | 2.546754  | 1.200775  | 0.167254  |
| O  | 1.832323  | 0.876562  | -1.018318 |
| C  | 1.778748  | 1.951820  | -1.943445 |
| C  | 1.031723  | 1.523972  | -3.189380 |
| O  | -0.327037 | 1.273344  | -2.870815 |
| C  | -1.121096 | 0.932562  | -3.997882 |
| C  | -2.539134 | 0.641197  | -3.552958 |
| H  | -4.809246 | -2.450131 | -1.182694 |
| H  | -3.304052 | -2.993308 | -2.015712 |
| H  | -1.010068 | -0.173204 | 3.020564  |
| H  | -0.659158 | -1.735519 | 3.873888  |
| H  | 1.390277  | -2.029725 | 2.391277  |
| H  | 1.453232  | -0.638641 | 3.541721  |
| H  | 3.618598  | 1.412112  | -0.067759 |
| H  | 2.113410  | 2.113847  | 0.640506  |
| H  | 1.504573  | 0.610079  | -3.624026 |
| H  | 1.113678  | 2.340914  | -3.948005 |
| H  | -1.138563 | 1.776362  | -4.730688 |
| H  | -0.696097 | 0.038834  | -4.516216 |
| H  | -3.182848 | 0.539190  | -4.460765 |
| H  | -2.932956 | 1.496316  | -2.951785 |
| Br | -2.756195 | 1.818498  | 1.443260  |
| H  | -4.528112 | -1.127236 | -3.208600 |
| H  | -4.306583 | -0.074558 | -1.751836 |
| H  | 1.273501  | 2.835139  | -1.483788 |
| H  | 2.809063  | 2.267599  | -2.238659 |
| H  | 3.116800  | 0.289863  | 2.024215  |
| H  | 2.879972  | -0.886475 | 0.679527  |
| K  | -0.970983 | 0.075340  | -0.331343 |
| C  | -2.552550 | -2.052147 | 2.020038  |
| C  | -3.141179 | -2.711489 | 0.788678  |
| H  | -3.028570 | -1.052925 | 2.170748  |
| H  | -2.761944 | -2.696430 | 2.909232  |
| H  | -4.215858 | -2.936861 | 0.989645  |
| H  | -2.623379 | -3.677112 | 0.568247  |

KF-18C6

44

Coordinates from ORCA-job geom-pbe E -1620.635532007206

|   |           |           |           |
|---|-----------|-----------|-----------|
| O | -2.515700 | -0.603091 | -2.811160 |
| C | -3.815863 | -1.080426 | -2.490923 |
| C | -3.709235 | -2.218672 | -1.494044 |
| O | -3.143050 | -1.718236 | -0.304338 |
| O | -1.193834 | -1.927301 | 1.883367  |
| C | -0.544555 | -1.140757 | 2.885815  |
| C | 0.935174  | -1.069353 | 2.578630  |

|   |           |           |           |
|---|-----------|-----------|-----------|
| O | 1.144099  | -0.186976 | 1.478252  |
| C | 2.484592  | -0.046820 | 1.067511  |
| C | 2.579375  | 1.145143  | 0.134530  |
| O | 1.810429  | 0.898108  | -1.035074 |
| C | 1.716966  | 2.022298  | -1.890456 |
| C | 0.973045  | 1.644006  | -3.153522 |
| O | -0.383154 | 1.346552  | -2.858198 |
| C | -1.111243 | 0.931014  | -4.003845 |
| C | -2.528092 | 0.558276  | -3.621739 |
| H | -4.736929 | -2.620652 | -1.314504 |
| H | -3.093377 | -3.051644 | -1.914884 |
| H | -1.000554 | -0.113600 | 2.879872  |
| H | -0.676083 | -1.614622 | 3.890020  |
| H | 1.338123  | -2.084286 | 2.339392  |
| H | 1.478604  | -0.687500 | 3.476667  |
| H | 3.649742  | 1.327223  | -0.131513 |
| H | 2.197327  | 2.052546  | 0.660409  |
| H | 1.466013  | 0.760851  | -3.626623 |
| H | 1.038676  | 2.495413  | -3.875469 |
| H | -1.149468 | 1.752734  | -4.761323 |
| H | -0.610885 | 0.053946  | -4.481371 |
| H | -3.107567 | 0.381500  | -4.561562 |
| H | -3.018214 | 1.407706  | -3.085175 |
| F | -2.185158 | 1.074936  | 1.762953  |
| H | -4.338950 | -1.438350 | -3.411693 |
| H | -4.427791 | -0.259791 | -2.045996 |
| H | 1.196450  | 2.866803  | -1.375606 |
| H | 2.733291  | 2.386645  | -2.180514 |
| H | 3.156857  | 0.140600  | 1.941110  |
| H | 2.850730  | -0.972414 | 0.557571  |
| K | -1.078712 | 0.170511  | -0.193776 |
| C | -2.615183 | -1.893150 | 2.025364  |
| C | -3.251331 | -2.572609 | 0.831570  |
| H | -2.940412 | -0.820383 | 2.086806  |
| H | -2.924132 | -2.438833 | 2.951357  |
| H | -4.327727 | -2.770178 | 1.053480  |
| H | -2.757086 | -3.553285 | 0.625220  |

TS1-18C6

52

Coordinates from ORCA-job geom-pbe E -4273.146443812740

|   |           |           |           |
|---|-----------|-----------|-----------|
| C | -1.202093 | -1.728957 | -0.925089 |
| C | -1.058038 | -1.055089 | -2.272804 |
| O | -2.427035 | -1.352681 | -0.320309 |
| O | -2.056722 | -1.538499 | -3.158901 |
| C | -1.949160 | -1.005951 | -4.471129 |
| C | -2.618462 | -1.962054 | 0.954459  |
| C | -3.099751 | -1.508976 | -5.319774 |
| O | -4.311851 | -1.025738 | -4.776219 |
| C | -5.455113 | -1.220338 | -5.598714 |
| C | -3.959639 | -1.572455 | 1.534227  |
| C | -6.670994 | -0.645454 | -4.903007 |
| O | -7.001797 | -1.460006 | -3.782512 |
| O | -4.999702 | -2.104292 | 0.717412  |
| C | -8.101790 | -0.937364 | -3.041595 |
| C | -6.295922 | -1.892960 | 1.276021  |
| C | -8.328566 | -1.784814 | -1.807877 |



|    |           |           |           |
|----|-----------|-----------|-----------|
| O  | -7.273378 | -1.562709 | -0.883771 |
| C  | -7.348572 | -2.356296 | 0.292051  |
| H  | -0.337807 | -1.427013 | -0.283863 |
| H  | -1.155884 | -2.837963 | -1.052263 |
| H  | -0.037862 | -1.277508 | -2.671860 |
| H  | -1.141572 | 0.052987  | -2.158926 |
| H  | -0.984092 | -1.315778 | -4.942187 |
| H  | -1.971812 | 0.109807  | -4.438496 |
| H  | -1.815834 | -1.637062 | 1.659663  |
| H  | -2.555726 | -3.072731 | 0.850702  |
| H  | -2.953906 | -1.137525 | -6.363530 |
| H  | -3.097527 | -2.625955 | -5.356017 |
| H  | -5.605623 | -2.307300 | -5.806664 |
| H  | -5.317408 | -0.701109 | -6.577794 |
| H  | -4.021110 | -1.994404 | 2.566661  |
| H  | -4.062542 | -0.464207 | 1.622128  |
| H  | -7.520733 | -0.620362 | -5.629299 |
| H  | -6.457552 | 0.394470  | -4.560186 |
| H  | -9.028782 | -0.954948 | -3.665554 |
| H  | -7.883326 | 0.116499  | -2.748208 |
| H  | -6.438188 | -0.813897 | 1.524341  |
| H  | -6.408161 | -2.477786 | 2.221275  |
| H  | -9.308338 | -1.504309 | -1.350525 |
| H  | -8.381783 | -2.865557 | -2.086587 |
| H  | -8.350508 | -2.250700 | 0.775127  |
| H  | -7.206971 | -3.435380 | 0.037299  |
| K  | -4.748625 | -0.943480 | -1.987397 |
| F  | -5.861426 | 1.299369  | -2.474404 |
| C  | -6.718633 | 3.160547  | -0.776818 |
| C  | -5.980693 | 1.873045  | -0.580254 |
| H  | -7.707840 | 3.142659  | -0.282574 |
| H  | -6.865347 | 3.302814  | -1.867717 |
| H  | -6.146453 | 4.020929  | -0.381791 |
| H  | -4.887707 | 1.861616  | -0.581702 |
| H  | -6.520068 | 0.935969  | -0.420274 |
| Br | -5.746698 | 1.902784  | 1.930675  |

cryptand

62

Coordinates from ORCA-job geom-pbe

|   |                   |                   |                   |
|---|-------------------|-------------------|-------------------|
| C | 2.18128602839373  | -1.24157519785638 | 0.77560539329549  |
| C | 2.01102842476690  | -0.06200139897035 | -0.18680386960237 |
| O | 2.66804914835654  | -2.43295004605705 | 0.14622833003541  |
| N | 3.26373596185792  | 0.41882692252849  | -0.76427371623979 |
| C | 3.82458027561157  | 1.66386988610269  | -0.30285568927581 |
| C | 1.73446313993306  | -3.46537901488236 | -0.09761732690467 |
| C | 3.16887374545142  | 2.96491321147852  | -0.80103251618951 |
| O | 1.86252043424977  | 3.06973276487466  | -0.25643151634493 |
| C | 0.97732510449793  | 3.89212449707245  | -0.97981670072429 |
| C | 0.84458466519032  | -3.30624793789820 | -1.32782271892482 |
| C | -0.44365822441107 | 3.65849512460685  | -0.50119027869516 |
| O | -0.84072775607563 | 2.34016991810807  | -0.82249266794456 |
| O | -0.26326274463732 | -2.46495767833385 | -1.06009824927994 |
| C | -2.16265859087118 | 2.03460245927244  | -0.42670960306368 |
| C | -1.14875782284112 | -2.37293547242479 | -2.16949632585130 |
| C | -2.44099927989631 | 0.53747206275199  | -0.52716915962897 |
| N | -2.18185533326112 | -0.08996720693775 | -1.81618658145797 |
| C | -2.37281910977777 | -1.54009021478894 | -1.79463693801206 |

|   |                   |                    |                   |
|---|-------------------|--------------------|-------------------|
| H | 1.21098705405173  | -1.44899373463752  | 1.28502526060347  |
| H | 2.92895285740351  | -0.97641842900413  | 1.55593922562219  |
| H | 3.79217230928001  | 3.84573865371676   | -0.49571536470656 |
| H | 3.11468811119273  | 2.96709380288466   | -1.91520724669724 |
| H | -2.33168625297704 | 2.32579028339386   | 0.63966981941632  |
| H | -2.89444625650802 | 2.63142005422927   | -1.02877452983233 |
| H | -1.48523406868647 | -3.40255066477137  | -2.45629149538662 |
| H | -0.62893418479148 | -1.92180111513280  | -3.04533328608562 |
| H | -3.50948792577057 | 0.40817880491066   | -0.19132396343821 |
| H | -1.80914297342444 | 0.02115825508164   | 0.22450225056202  |
| H | -2.69276839109569 | -1.86023937860813  | -0.77950560703916 |
| H | -3.21073109600720 | -1.83542658528149  | -2.47249921436186 |
| H | 3.80746465693991  | 1.69446446926194   | 0.81216807909286  |
| H | 4.90053808872441  | 1.70678448664261   | -0.59109179256396 |
| H | 1.53322774324466  | 0.76916202929193   | 0.36943187864253  |
| H | 1.28207283582677  | -0.32269943644802  | -0.98058290712084 |
| H | 2.34088273166413  | -4.38445832655925  | -0.24282165357322 |
| H | 1.07898206614288  | -3.63148172712781  | 0.79241807714331  |
| H | 0.47942291823359  | -4.32267349661861  | -1.62773200561641 |
| H | 1.44648330273904  | -2.91139453198158  | -2.18286132765996 |
| H | 1.22504365335736  | 4.97761951631442   | -0.85213994755692 |
| H | 1.03957858874652  | 3.66278320931112   | -2.07222367068864 |
| C | 3.75265191490253  | -0.18412562609349  | -1.98313795409912 |
| C | -2.75514078758890 | 0.57782236174731   | -2.96873088346572 |
| C | 3.28948800994810  | 0.43279452617076   | -3.31362677073777 |
| H | 3.46060870117144  | -1.25436327611816  | -1.97213092048041 |
| H | 4.86904475248516  | -0.170744446160457 | -1.99250611367996 |
| H | -2.54573398487367 | 1.66309399720203   | -2.88236971317174 |
| H | -3.87936991571475 | 0.48272307101223   | -3.02290670615616 |
| C | -2.22720989407943 | 0.08598519007576   | -4.32836261271224 |
| O | -0.82139948966615 | 0.04608012182629   | -4.47334226380483 |
| H | -2.69010457794202 | 0.73414959890387   | -5.11583924649179 |
| H | -2.56804196887737 | -0.95049448587384  | -4.52868285965685 |
| O | 1.87775044275281  | 0.42712872137255   | -3.36713521446457 |
| H | 3.72934316621745  | -0.15131079120044  | -4.16343092478348 |
| H | 3.66986425082037  | 1.48148213961131   | -3.42164036075089 |
| C | 1.33134594128897  | 1.11560965342968   | -4.47067487864262 |
| C | -0.16335146489383 | 1.28798681517331   | -4.28001434264754 |
| H | -1.11306315011205 | 4.41127452185066   | -0.98857982621664 |
| H | -0.50287740281220 | 3.82521849789372   | 0.60291615703350  |
| H | 1.53893239604824  | 0.57525188957062   | -5.42794436303199 |
| H | 1.79099608022696  | 2.13284596510780   | -4.55934239192600 |
| H | -0.34337400785780 | 1.67795376242665   | -3.25225472306112 |
| H | -0.53522284626788 | 2.04173899000130   | -5.02004353099824 |

KBr-cryptand

64

Coordinates from ORCA-job geom-pbe

|   |                  |                   |                   |
|---|------------------|-------------------|-------------------|
| C | 3.30217937450832 | -1.89659908391994 | 0.01000946215506  |
| C | 3.60833929761960 | -0.45410549700309 | 0.40958876710393  |
| O | 2.04109190844018 | -1.99766977157368 | -0.63063334200504 |
| N | 3.41125366725173 | 0.57234573431869  | -0.62228194988602 |
| C | 3.70794040346770 | 1.90063828243879  | -0.08213913262851 |
| C | 1.44916478140597 | -3.28561523306804 | -0.54522969115516 |
| C | 2.84099122285761 | 3.06194399284678  | -0.57191044656156 |
| O | 1.48362483850554 | 2.79037383475638  | -0.29546463206986 |
| C | 0.63180398703725 | 3.92254712784179  | -0.39078748075485 |

|    |                   |                   |                   |
|----|-------------------|-------------------|-------------------|
| C  | 0.20096707520968  | -3.33391926066952 | -1.41061067161621 |
| C  | -0.81445474383919 | 3.48646226358656  | -0.29831131993126 |
| O  | -1.17644908057996 | 2.82324108522381  | -1.51608133589711 |
| O  | -0.67757171518359 | -2.30306995768685 | -1.01253771439443 |
| C  | -2.56718992407825 | 2.55662477170009  | -1.66152052594111 |
| C  | -2.03464281585107 | -2.46952868206792 | -1.38898430302852 |
| C  | -3.02560679330562 | 1.18657058149605  | -1.15948204348204 |
| N  | -2.43107656464100 | 0.01542597191689  | -1.83323075041525 |
| C  | -2.80787874662596 | -1.19208028092180 | -1.08501652933363 |
| H  | 3.31446088196792  | -2.49664276046793 | 0.94963348994862  |
| H  | 4.09624757848394  | -2.32535432667749 | -0.65097223227309 |
| H  | 3.18029523733466  | 3.97542968262313  | -0.02332149081339 |
| H  | 2.97734694989058  | 3.27499021335660  | -1.65861266069884 |
| H  | -3.16577799294607 | 3.32633924551847  | -1.12198664594953 |
| H  | -2.79302455061213 | 2.69317665772934  | -2.74231291965788 |
| H  | -2.49686812318825 | -3.29614586738323 | -0.79591416846291 |
| H  | -2.11201435265972 | -2.76861588163290 | -2.46072944901981 |
| H  | -4.14852389641438 | 1.17402801237140  | -1.23076558994693 |
| H  | -2.76533898066756 | 1.10004142065849  | -0.07872037271546 |
| H  | -2.65172965942800 | -0.96706625074850 | -0.00620756734251 |
| H  | -3.89839949815270 | -1.42607901556972 | -1.22600898017098 |
| H  | 3.56231638560472  | 1.85086825937152  | 1.01590942764270  |
| H  | 4.78350321783607  | 2.18005751370038  | -0.24543560658465 |
| H  | 4.66038472572167  | -0.46247340944813 | 0.80672742141601  |
| H  | 2.94852615371039  | -0.18520423770115 | 1.26214631265882  |
| H  | 2.15611092604305  | -4.07535139897752 | -0.89871981368280 |
| H  | 1.18437829393668  | -3.50732492476340 | 0.51626983933346  |
| H  | -0.26635243260290 | -4.34003197916121 | -1.27702682173775 |
| H  | 0.46903278747872  | -3.22262057612814 | -2.49039865740989 |
| H  | 0.85060806569600  | 4.63761859624230  | 0.43971777994255  |
| H  | 0.80352567865234  | 4.45686721553649  | -1.35778330874980 |
| K  | 0.39110489992904  | 0.27671194705296  | -0.88806826164850 |
| C  | 4.04375633601106  | 0.26499721092430  | -1.89818311404226 |
| C  | -2.70774265015082 | -0.03284571126108 | -3.26646589912734 |
| C  | 3.50414743683791  | 1.03504663939987  | -3.10640719657836 |
| H  | 3.87529400367587  | -0.80871133289888 | -2.10825929805495 |
| H  | 5.15803596473520  | 0.42284870362512  | -1.87286197779186 |
| H  | -2.85102616257591 | 1.00574930781049  | -3.62434199170361 |
| H  | -3.67765223289508 | -0.55501820689479 | -3.49397294877336 |
| C  | -1.63441862786938 | -0.68353240730847 | -4.16378857820578 |
| O  | -0.29799056052902 | -0.26184930028960 | -3.95758305442434 |
| H  | -1.93826533132869 | -0.50192086363599 | -5.22644962887092 |
| H  | -1.60701132628812 | -1.78129374030824 | -4.02528235974098 |
| O  | 2.09414431197545  | 0.92861449915724  | -3.15234129648384 |
| H  | 3.96342259585806  | 0.58766272172312  | -4.02128239014795 |
| H  | 3.81413735624903  | 2.10863813247985  | -3.09058924070068 |
| C  | 1.51945111522016  | 1.21843144310598  | -4.41394867155016 |
| C  | 0.00944850775245  | 1.07366427162307  | -4.32625367574545 |
| H  | -1.44822601881440 | 4.39514717811549  | -0.16384535380912 |
| H  | -0.95715865633443 | 2.81175564913641  | 0.58336808413025  |
| H  | 1.92579792586821  | 0.52201165476190  | -5.18775505085567 |
| H  | 1.75857766361852  | 2.26228163120290  | -4.73524347345927 |
| H  | -0.39512527765671 | 1.80371557561755  | -3.58711647907459 |
| H  | -0.42195038543237 | 1.31910504940717  | -5.32844993602188 |
| Br | -1.06167445573999 | 0.50279787978988  | 1.99822744679630  |

KF-cryptand

## Coordinates from ORCA-job geom-pbe

|   |                   |                   |                   |
|---|-------------------|-------------------|-------------------|
| C | 3.35690925715470  | -1.89540823439679 | -0.00823730706342 |
| C | 3.71444548759751  | -0.46254327344182 | 0.38530589650761  |
| O | 2.05463290234122  | -1.96079211763151 | -0.55728567143462 |
| N | 3.46439486771175  | 0.57421771381493  | -0.62066493306141 |
| C | 3.76443632884542  | 1.90382167004486  | -0.08549129289846 |
| C | 1.49712040981917  | -3.26643453939851 | -0.57409343252659 |
| C | 2.83415461548977  | 3.04790618546139  | -0.49599817796439 |
| O | 1.50635924145597  | 2.73994938345789  | -0.13002600551573 |
| C | 0.60814131609074  | 3.84731522734627  | -0.19112904712339 |
| C | 0.21992234785275  | -3.26927518744258 | -1.39866000675570 |
| C | -0.82599154403335 | 3.36251526695860  | -0.23180619207603 |
| O | -1.10274325975825 | 2.88033823467860  | -1.55653446669548 |
| O | -0.66078008566021 | -2.29251304696793 | -0.88995012625384 |
| C | -2.47616282493369 | 2.60207302708679  | -1.80999329506989 |
| C | -2.01681765450149 | -2.40535251143125 | -1.31068366510203 |
| C | -2.98938653820281 | 1.26533049779372  | -1.27509798185294 |
| N | -2.41141581106366 | 0.05576438740053  | -1.89681968967175 |
| C | -2.75432314742909 | -1.09726407857038 | -1.05163281606395 |
| H | 3.42757429090931  | -2.51338407407402 | 0.91887982456651  |
| H | 4.09616950198412  | -2.32616694519539 | -0.72967787229559 |
| H | 3.19155509189124  | 3.96464747360701  | 0.03638661518231  |
| H | 2.88965735954410  | 3.27207978593664  | -1.58760949319279 |
| H | -3.11276040704756 | 3.40594040078568  | -1.36716251715826 |
| H | -2.59337983144215 | 2.68791513297146  | -2.91388841363698 |
| H | -2.52328354822126 | -3.20814570550488 | -0.72143043764681 |
| H | -2.06357285595777 | -2.71862205202656 | -2.37854174448767 |
| H | -4.11011302039221 | 1.27583368609634  | -1.37166857189111 |
| H | -2.71800108192164 | 1.19950386017896  | -0.19067999408107 |
| H | -2.52353161129572 | -0.78391418940101 | -0.00531742934916 |
| H | -3.85369534522006 | -1.32584309814298 | -1.11779310347243 |
| H | 3.70701306740348  | 1.83897945477056  | 1.02021869545504  |
| H | 4.81674937429155  | 2.21390178662142  | -0.32524377372830 |
| H | 4.78962423958220  | -0.49154367570772 | 0.71513449204876  |
| H | 3.11903282527572  | -0.19276287015022 | 1.28323407860246  |
| H | 2.21030497455981  | -3.99927266273393 | -1.02454231784055 |
| H | 1.28169736978666  | -3.59652411795008 | 0.47087198061890  |
| H | -0.22196944835073 | -4.29456275935549 | -1.33401620147682 |
| H | 0.45180421629813  | -3.06482756797045 | -2.47313088167057 |
| H | 0.75575766215020  | 4.49984436154878  | 0.70362971977353  |
| H | 0.82190520554627  | 4.45781325831614  | -1.10158125960099 |
| K | 0.34367655063716  | 0.29832633603547  | -0.73738285208848 |
| C | 4.04997261231710  | 0.28426014509991  | -1.92264381493517 |
| C | -2.74219636886749 | -0.07310577323038 | -3.31022329292099 |
| C | 3.44882546260599  | 1.03759090631942  | -3.10951026842951 |
| H | 3.90201887612041  | -0.79313852143631 | -2.12907472595355 |
| H | 5.16039212398916  | 0.46955249230141  | -1.93894807056950 |
| H | -2.90304318560552 | 0.94728899779480  | -3.71259769919588 |
| H | -3.71928489556902 | -0.60670828119593 | -3.47507478293987 |
| C | -1.69861159929686 | -0.76495275960371 | -4.21429489566937 |
| O | -0.34760050104700 | -0.38062309128867 | -4.02655957640273 |
| H | -2.00843503019197 | -0.58467597349573 | -5.27625755429581 |
| H | -1.70040223817745 | -1.86229083414938 | -4.06691054972174 |
| O | 2.04849699602722  | 0.85007238133022  | -3.14564344030498 |
| H | 3.92523016419077  | 0.62973739649537  | -4.03474757892983 |
| H | 3.69808120046528  | 2.12719753569389  | -3.08262268248002 |
| C | 1.46018398132967  | 1.14481833609579  | -4.40129434594817 |

|   |                   |                  |                   |
|---|-------------------|------------------|-------------------|
| C | -0.04505032712857 | 0.97408324492101 | -4.31796933896021 |
| H | -1.49380618795530 | 4.22995082989072 | -0.00897142719885 |
| H | -1.00966295026258 | 2.54819518580682 | 0.52486297184407  |
| H | 1.88130110722331  | 0.47006198260891 | -5.18680667600786 |
| H | 1.67711047669258  | 2.19847866322995 | -4.70554156570722 |
| H | -0.44803937041849 | 1.65913742365120 | -3.53772723870394 |
| H | -0.48029094992022 | 1.27397149395530 | -5.30439926709379 |
| F | -1.35771988530834 | 0.69635379578686 | 1.07087548851698  |

TS1-cryptand (EtBr)

72

Coordinates from ORCA-job geom-pbe

|   |                   |                   |                   |
|---|-------------------|-------------------|-------------------|
| C | 3.20250976510503  | -1.95492057469626 | 0.08396904880976  |
| C | 3.56488209196295  | -0.53817916941163 | 0.51480275581283  |
| O | 1.89559069279378  | -2.01170305399623 | -0.47995018425544 |
| N | 3.32277942111961  | 0.53949048095016  | -0.45946596512637 |
| C | 3.62899228132050  | 1.84042201690281  | 0.13809662904317  |
| C | 1.25585613980108  | -3.26936604434957 | -0.28738137268969 |
| C | 2.74227764540236  | 3.01595746813384  | -0.27146277316635 |
| O | 1.39003762679234  | 2.73233178397642  | 0.03993120576485  |
| C | 0.52953209335088  | 3.85916179060203  | -0.06510324210427 |
| C | -0.01580635338987 | -3.33056258706159 | -1.11176653159354 |
| C | -0.91590891817971 | 3.41042681134799  | -0.11901547025840 |
| O | -1.17798265796435 | 2.85637328216924  | -1.41459523711918 |
| O | -0.87919080860285 | -2.26436716840291 | -0.74825556610164 |
| C | -2.55271148735443 | 2.63206700288372  | -1.70165144935060 |
| C | -2.20208425965887 | -2.38606794033523 | -1.24649982806945 |
| C | -3.11828272349965 | 1.29778288017512  | -1.21080159396018 |
| N | -2.52917133647509 | 0.08771113227785  | -1.81395702412866 |
| C | -2.96372408151636 | -1.08223622003844 | -1.03819726491029 |
| H | 3.24764792179385  | -2.57076742476247 | 1.00980706123296  |
| H | 3.93748162207999  | -2.38014347807454 | -0.64435944881015 |
| H | 3.09561461530602  | 3.91102131245820  | 0.29772617733275  |
| H | 2.83568904483167  | 3.26778674511311  | -1.35399012718321 |
| H | -3.17452865155742 | 3.44559338862841  | -1.25742813645616 |
| H | -2.65012276827479 | 2.73623658732370  | -2.80481781569424 |
| H | -2.74459537988160 | -3.19121665941318 | -0.69305784338020 |
| H | -2.18608556198419 | -2.69909733292316 | -2.31639098273999 |
| H | -4.23147073506990 | 1.33530233019050  | -1.36944367848597 |
| H | -2.93728477839265 | 1.22161473556459  | -0.11690779596128 |
| H | -2.85335720442656 | -0.80886123491182 | 0.03239678023887  |
| H | -4.05007787150151 | -1.30330806457167 | -1.22351336245106 |
| H | 3.52286358818952  | 1.73374630813637  | 1.23669338127441  |
| H | 4.69671283462432  | 2.13840087102548  | -0.04281329227432 |
| H | 4.64046292097191  | -0.57619504246891 | 0.83721697583727  |
| H | 2.97214285441778  | -0.31244415135091 | 1.42650261386378  |
| H | 1.91736314717208  | -4.10583267756871 | -0.62002701205087 |
| H | 1.03734818530379  | -3.41056888699136 | 0.79843814327730  |
| H | -0.50237397403301 | -4.31746429324753 | -0.91836605829386 |
| H | 0.21856591577853  | -3.27340086666044 | -2.20347262852964 |
| H | 0.67391027620015  | 4.53449221714280  | 0.81374117079350  |
| H | 0.76965192855040  | 4.44342595758952  | -0.98627641606189 |
| K | 0.30305920516461  | 0.28009642372716  | -0.81106063421115 |
| C | 3.95423302168274  | 0.29310936451512  | -1.74979252908198 |
| C | -2.75920170011817 | -0.00579594391433 | -3.25407730057244 |
| C | 3.43472029999884  | 1.12130874295444  | -2.92569484511483 |
| H | 3.78064081823380  | -0.76924713011103 | -2.00918253190453 |

|    |                   |                   |                   |
|----|-------------------|-------------------|-------------------|
| H  | 5.06985108750101  | 0.43847766850995  | -1.70865692851468 |
| H  | -2.89403441632358 | 1.02142832619980  | -3.64779597353184 |
| H  | -3.71959419626499 | -0.53794204744710 | -3.49550738367254 |
| C  | -1.65148955005032 | -0.67987705793876 | -4.08874875252771 |
| O  | -0.32861640286461 | -0.23552176001739 | -3.84474392008080 |
| H  | -1.91483549808152 | -0.54110296011717 | -5.16818932562316 |
| H  | -1.62080498855731 | -1.77138821494026 | -3.90687504090461 |
| O  | 2.02420590422740  | 1.01090766821093  | -3.01317360238086 |
| H  | 3.91634502313551  | 0.72193308802642  | -3.85022675901715 |
| H  | 3.73535582229752  | 2.19492623675608  | -2.85205993073083 |
| C  | 1.49002491222932  | 1.24502389163986  | -4.30303694031190 |
| C  | -0.01996780902889 | 1.08686184737956  | -4.25803600527802 |
| H  | -1.56927702060497 | 4.30075621767877  | 0.04390566002905  |
| H  | -1.12116378998978 | 2.65598742698405  | 0.67934998653970  |
| H  | 1.92738073248048  | 0.52327221106287  | -5.03531607529170 |
| H  | 1.72775925957827  | 2.27829285106225  | -4.65787784432262 |
| H  | -0.45158573695306 | 1.84162327920495  | -3.56037043956113 |
| H  | -0.42313723091266 | 1.28815032685435  | -5.28121575162194 |
| H  | -0.81619242858058 | -0.12077154773938 | 4.55688951445346  |
| H  | 0.42623913668826  | 0.20636968002379  | 2.39764173597007  |
| Br | 1.41665093281788  | -2.04928634654764 | 3.42232081755804  |
| C  | -1.30355112001847 | -0.52736248956332 | 3.65101138307383  |
| C  | -0.37106171927069 | -0.53666710646226 | 2.47964479095295  |
| H  | -2.16733073321041 | 0.11977319014751  | 3.39293987159959  |
| F  | -1.40873154537638 | 0.64612164667884  | 1.27310495215239  |
| H  | -1.67591392409220 | -1.54300018153365 | 3.88176829470924  |
| H  | -0.46539940684283 | -1.28872953263967 | 1.69201766514347  |

#### KI-cryptand

64

Coordinates from ORCA-job geom-pbe

|   |                   |                   |                   |
|---|-------------------|-------------------|-------------------|
| C | 3.28567356080692  | -1.88302771599333 | 0.03089417909737  |
| C | 3.57697485988881  | -0.43398157282354 | 0.41725674643578  |
| O | 2.04320319562687  | -2.00317852972082 | -0.64462356159011 |
| N | 3.40628360386376  | 0.57832726932476  | -0.63393428476701 |
| C | 3.70781146641297  | 1.91199810667248  | -0.11161655802340 |
| C | 1.42625853060419  | -3.27444626325995 | -0.49900216944574 |
| C | 2.83876343048535  | 3.06678519957185  | -0.61276808934534 |
| O | 1.48239621152018  | 2.79553116860763  | -0.32748557982366 |
| C | 0.63008313546197  | 3.92625547009938  | -0.41422664934469 |
| C | 0.19885712825375  | -3.35516667008389 | -1.39075886323826 |
| C | -0.81431964102033 | 3.48917285549685  | -0.29358984414973 |
| O | -1.19645477860136 | 2.81410583614979  | -1.49698961318092 |
| O | -0.67768280493323 | -2.29616494407986 | -1.06977810427926 |
| C | -2.58979081783326 | 2.54719892276174  | -1.61848951822643 |
| C | -2.03213416173916 | -2.48167339788826 | -1.43840995057968 |
| C | -3.03208389147087 | 1.16445805581967  | -1.13706499954062 |
| N | -2.43700510729132 | 0.00986255480344  | -1.83724025895491 |
| C | -2.81989547612834 | -1.21544676375919 | -1.12246969918076 |
| H | 3.27304423499657  | -2.46590452997128 | 0.98053850653163  |
| H | 4.09923526743468  | -2.31962062895648 | -0.60019045769719 |
| H | 3.17702459113896  | 3.98781280382371  | -0.07657403470861 |
| H | 2.96992980555949  | 3.26587421554774  | -1.70274294827006 |
| H | -3.17885506729381 | 3.30175479221414  | -1.04850255412066 |
| H | -2.84137206909200 | 2.70675926098850  | -2.69017668621651 |
| H | -2.48125423997389 | -3.31556284188509 | -0.84493455182612 |

|   |                   |                   |                   |
|---|-------------------|-------------------|-------------------|
| H | -2.11433729029338 | -2.77965930436004 | -2.51094976660294 |
| H | -4.15568537446124 | 1.14652304884140  | -1.19671914874542 |
| H | -2.76127866885929 | 1.06159436193386  | -0.06018812612162 |
| H | -2.67994373370870 | -1.01483915332093 | -0.03668234511135 |
| H | -3.90643844155545 | -1.45233555886699 | -1.28699707134222 |
| H | 3.56729682115809  | 1.87688050309739  | 0.98760446918841  |
| H | 4.78268272886402  | 2.18820640247854  | -0.28384738523144 |
| H | 4.61874382361827  | -0.43503482074769 | 0.84057459313961  |
| H | 2.89251058943300  | -0.15492988757725 | 1.24751968877572  |
| H | 2.12784476394403  | -4.09443278867804 | -0.78813097825707 |
| H | 1.12983728232558  | -3.42719830881308 | 0.56627489801961  |
| H | -0.28407535606238 | -4.34699661940403 | -1.21401195163637 |
| H | 0.49231278659292  | -3.30582926914063 | -2.46852634870365 |
| H | 0.86173417622259  | 4.64712190814646  | 0.40800882665023  |
| H | 0.78311661404853  | 4.45596041335915  | -1.38697343397042 |
| K | 0.41093788550870  | 0.27158540536558  | -0.92392622921103 |
| C | 4.04301792606701  | 0.24780485617045  | -1.90128468008850 |
| C | -2.70097725553499 | -0.00453177529687 | -3.27339301234487 |
| C | 3.52329718841920  | 1.01919335363134  | -3.11810788325759 |
| H | 3.85655189178043  | -0.82455679112479 | -2.10299463531943 |
| H | 5.15981472244047  | 0.38712552663753  | -1.87162933554571 |
| H | -2.83225424630976 | 1.04226876849128  | -3.61121146144687 |
| H | -3.67195854029204 | -0.51543974240678 | -3.52110097989738 |
| C | -1.62332947434282 | -0.64575829552856 | -4.17188809598142 |
| O | -0.28898504819699 | -0.22300428607984 | -3.95584603724978 |
| H | -1.92254249083331 | -0.45601286229360 | -5.23425256038360 |
| H | -1.59525832605731 | -1.74432985597870 | -4.04137530133135 |
| O | 2.11084148664861  | 0.94515504163229  | -3.16480726851203 |
| H | 3.97319930038599  | 0.55432869110481  | -4.02883440268504 |
| H | 3.85743042279260  | 2.08575406287595  | -3.11002047999280 |
| C | 1.54091106864592  | 1.23351694997723  | -4.42845906096520 |
| C | 0.02910285457100  | 1.10574700970304  | -4.33878827389349 |
| H | -1.44752073643351 | 4.39732989638566  | -0.15327517187186 |
| H | -0.93799134234466 | 2.82323957076448  | 0.59758302149789  |
| H | 1.93793732942515  | 0.52639187193601  | -5.19729050125383 |
| H | 1.79294366445988  | 2.27201506342219  | -4.75744160804489 |
| H | -0.36952396707878 | 1.84707370376901  | -3.60726783076403 |
| H | -0.40082119708141 | 1.34446860055668  | -5.34306366972218 |
| I | -0.92356480458287 | 0.31798165587746  | 2.20856908265878  |

TS1-cryptand (EtI)

72

Coordinates from ORCA-job geom-pbe E -2342.014408170963

|   |           |           |           |
|---|-----------|-----------|-----------|
| C | 3.220047  | -1.958339 | 0.061749  |
| C | 3.590264  | -0.543766 | 0.493027  |
| O | 1.906001  | -2.009097 | -0.485741 |
| N | 3.335267  | 0.537621  | -0.473557 |
| C | 3.640777  | 1.836942  | 0.128002  |
| C | 1.276936  | -3.275637 | -0.319513 |
| C | 2.753638  | 3.013861  | -0.276821 |
| O | 1.401334  | 2.730924  | 0.035278  |
| C | 0.541730  | 3.858350  | -0.071247 |
| C | -0.000430 | -3.326086 | -1.136297 |
| C | -0.904662 | 3.411842  | -0.120672 |
| O | -1.170569 | 2.852874  | -1.413178 |
| O | -0.864932 | -2.268928 | -0.749936 |

|   |           |           |           |
|---|-----------|-----------|-----------|
| C | -2.546249 | 2.629377  | -1.697073 |
| C | -2.191358 | -2.388365 | -1.240269 |
| C | -3.111687 | 1.295625  | -1.204408 |
| N | -2.522937 | 0.085202  | -1.807217 |
| C | -2.951114 | -1.084189 | -1.026835 |
| H | 3.275300  | -2.578316 | 0.985289  |
| H | 3.945057  | -2.382434 | -0.677292 |
| H | 3.108404  | 3.906970  | 0.294562  |
| H | 2.845876  | 3.269124  | -1.358612 |
| H | -3.166452 | 3.443684  | -1.252118 |
| H | -2.645912 | 2.732781  | -2.800141 |
| H | -2.731204 | -3.193552 | -0.684354 |
| H | -2.182409 | -2.700253 | -2.310483 |
| H | -4.224984 | 1.333083  | -1.362176 |
| H | -2.929874 | 1.220584  | -0.110647 |
| H | -2.832366 | -0.809415 | 0.042531  |
| H | -4.038851 | -1.305691 | -1.203357 |
| H | 3.535567  | 1.726283  | 1.226293  |
| H | 4.708193  | 2.136391  | -0.052744 |
| H | 4.670195  | -0.584055 | 0.800210  |
| H | 3.011827  | -0.320156 | 1.414995  |
| H | 1.941869  | -4.098790 | -0.677751 |
| H | 1.068234  | -3.446873 | 0.764109  |
| H | -0.482370 | -4.317959 | -0.957044 |
| H | 0.227169  | -3.249541 | -2.228275 |
| H | 0.688879  | 4.536224  | 0.805185  |
| H | 0.780662  | 4.439586  | -0.994652 |
| K | 0.311364  | 0.278986  | -0.805901 |
| C | 3.960241  | 0.298682  | -1.768586 |
| C | -2.760102 | -0.010871 | -3.246006 |
| C | 3.431458  | 1.127851  | -2.939506 |
| H | 3.790215  | -0.763734 | -2.030202 |
| H | 5.075412  | 0.448505  | -1.732583 |
| H | -2.898741 | 1.015715  | -3.640103 |
| H | -3.720928 | -0.544722 | -3.481891 |
| C | -1.655547 | -0.683829 | -4.085741 |
| O | -0.332011 | -0.238558 | -3.847455 |
| H | -1.923871 | -0.544873 | -5.163951 |
| H | -1.623184 | -1.775389 | -3.904513 |
| O | 2.020958  | 1.012804  | -3.020378 |
| H | 3.909788  | 0.732136  | -3.867335 |
| H | 3.728916  | 2.202294  | -2.865272 |
| C | 1.481212  | 1.247982  | -4.307880 |
| C | -0.028044 | 1.085684  | -4.258047 |
| H | -1.555865 | 4.304143  | 0.040085  |
| H | -1.110115 | 2.661352  | 0.681209  |
| H | 1.918057  | 0.528959  | -5.043157 |
| H | 1.714862  | 2.282614  | -4.661420 |
| H | -0.458968 | 1.837427  | -3.556824 |
| H | -0.435217 | 1.288850  | -5.279310 |
| H | -0.969676 | -0.084046 | 4.587863  |
| H | 0.378998  | 0.220819  | 2.484903  |
| I | 1.489504  | -2.138634 | 3.640410  |
| C | -1.410634 | -0.501663 | 3.663429  |
| C | -0.426492 | -0.516746 | 2.534181  |
| H | -2.263707 | 0.141052  | 3.359401  |
| F | -1.408695 | 0.650461  | 1.271677  |
| H | -1.793165 | -1.515048 | 3.887513  |



H -0.473161 -1.283717 1.755883

DB18C6-2OH

67

Coordinates from ORCA-job geom-pbe

|   |                   |                  |                   |
|---|-------------------|------------------|-------------------|
| C | -6.59984767050027 | 5.08236547861785 | 1.70641462215890  |
| C | -6.87503430604370 | 5.76909171735843 | 0.38315464727610  |
| O | -5.21270430921424 | 4.80144579899015 | 1.80679255205490  |
| O | -6.84910549060284 | 4.83090395823796 | -0.67255676449558 |
| C | -7.04484073743034 | 5.41825129939013 | -1.94172499791236 |
| C | -4.76588201450587 | 4.09801480099892 | 2.88621825797532  |
| C | -6.93837260365723 | 4.36872065793145 | -3.03065809202956 |
| O | -5.57214630177911 | 4.03948220067508 | -3.22715037205531 |
| C | -5.25586083939898 | 3.06435488832167 | -4.12462273177189 |
| C | -3.37728423461702 | 3.75993498425129 | 2.87324256737992  |
| C | -3.86899457592492 | 2.72862933883321 | -4.20688161496319 |
| O | -3.05002042633844 | 3.43224664437233 | -3.37678761402512 |
| O | -2.67701826668211 | 4.19584622394255 | 1.79070742197765  |
| C | -1.68717080081912 | 3.05128730896440 | -3.24972906154705 |
| C | -1.35362556440879 | 3.71016726238294 | 1.58400676429623  |
| C | -1.13349725778556 | 3.80996518166717 | -2.05694450244711 |
| O | -1.64226223031802 | 3.29612461019644 | -0.81109063972485 |
| C | -0.96394352010009 | 4.10776292991547 | 0.17455850709791  |
| C | -5.56088480683815 | 3.69847145308223 | 3.97252060504067  |
| C | -2.83355784731162 | 3.02775221528172 | 3.94053749662254  |
| C | -5.00153773685330 | 2.96488769801495 | 5.03811730967285  |
| C | -6.17476532813315 | 2.39305041047623 | -4.94667334703696 |
| C | -3.44814243317855 | 1.73549238645562 | -5.10366174538053 |
| C | -5.73860206433850 | 1.39578813822730 | -5.84187924994466 |
| C | 0.38884723776020  | 3.87204459953957 | -1.83453174761304 |
| C | 0.52148730885674  | 4.15401852484655 | -0.28592966926084 |
| C | -4.38272481109426 | 1.06797060478558 | -5.91963212200783 |
| C | -3.64531137794547 | 2.62977435095155 | 5.02122401322015  |
| C | 1.32084946331108  | 2.64738338763135 | -2.03038408955643 |
| C | 1.65270721805612  | 3.17596673136038 | 0.16817601016178  |
| C | 0.89179372930208  | 1.35386328259392 | -1.26580149704884 |
| C | 1.30192264219312  | 1.67313345253338 | 0.22851988770797  |
| C | 2.49930596989630  | 3.11995046610314 | -1.13555824768872 |
| O | -0.45442104211609 | 0.91996324195909 | -1.34108733518635 |
| O | 0.32748120630937  | 1.25592187268086 | 1.15756068137664  |
| H | -7.19665478751500 | 4.14434890497825 | 1.77043718837879  |
| H | -6.92064694127184 | 5.75495650972186 | 2.53660005170710  |
| H | -7.52260562704208 | 3.46602205119383 | -2.73775731262179 |
| H | -7.37855885092958 | 4.77812308405569 | -3.97076411911871 |
| H | -1.58653332739557 | 1.95289080283174 | -3.11547029860680 |
| H | -1.10963288235212 | 3.34170465237429 | -4.15968060283760 |
| H | -1.29557813651193 | 2.61396643357589 | 1.72425201339889  |
| H | -0.64307652241549 | 4.17944595153588 | 2.30385985160372  |
| H | -1.50155577329605 | 4.85946428583857 | -2.15646062786563 |
| H | -1.35670465770661 | 5.14421516856774 | 0.04083738066395  |
| H | -6.62844390905541 | 3.95549441969988 | 3.99533649233756  |
| H | -1.76805971340019 | 2.76008072469945 | 3.93337616657421  |
| H | -5.64248888798651 | 2.65734063990497 | 5.87793795118493  |
| H | -7.24322065484696 | 2.64118110176192 | -4.89203850428376 |
| H | -2.38336932680099 | 1.47135938723338 | -5.16907504430219 |
| H | -6.47481771137199 | 0.87751624463619 | -6.47420318377681 |
| H | 0.80638404188752  | 4.70437661625887 | -2.43715143543421 |

|   |                   |                  |                   |
|---|-------------------|------------------|-------------------|
| H | 0.89566995022660  | 5.18141946297247 | -0.10047478436628 |
| H | -4.03475363658753 | 0.28759567801354 | -6.61316319886805 |
| H | -3.20184605476259 | 2.05483445250088 | 5.84819444758032  |
| H | 1.56617353168164  | 2.45539270622772 | -3.09368754714416 |
| H | 2.18563855125765  | 3.53255948914221 | 1.07110589984453  |
| H | 1.49052400675705  | 0.50427659769010 | -1.65199439409837 |
| H | 2.25460447755472  | 1.14326292003502 | 0.46336218097624  |
| H | 3.34045984289446  | 2.39911162655865 | -1.07856763159081 |
| H | 2.90455789269865  | 4.10344650861511 | -1.44640081627049 |
| H | -1.03495368583063 | 1.67555142632341 | -1.04367706461693 |
| H | -0.28961236320769 | 0.68417420353413 | 0.64440552716116  |
| H | -7.87850435771785 | 6.26208241012353 | 0.44449770915007  |
| H | -6.11698896188291 | 6.57322618060375 | 0.22025291765481  |
| H | -8.05837174059548 | 5.88999169371842 | -2.00466673738536 |
| H | -6.29152996222456 | 6.22161956350179 | -2.12960837735165 |

KBr-DB18C6-2OH

69

Coordinates from ORCA-job geom-pbe

|   |                   |                  |                   |
|---|-------------------|------------------|-------------------|
| C | -6.69609428933204 | 4.86168351087346 | 1.78219965817501  |
| C | -7.06311316048179 | 5.48087593664713 | 0.45132892366061  |
| O | -5.30462791937684 | 4.57190962227547 | 1.78236320855733  |
| O | -6.89150046280246 | 4.53719016914932 | -0.59589554957926 |
| C | -7.24652024681874 | 5.06558407115449 | -1.86485519066566 |
| C | -4.72646094634700 | 4.15186882662664 | 2.96038084412353  |
| C | -7.03393278070181 | 4.02879366744224 | -2.94653029271288 |
| O | -5.64299390261603 | 3.75461336017951 | -3.04572700209360 |
| C | -5.19630062797861 | 3.01057125734637 | -4.11584833598732 |
| C | -3.31821664139998 | 3.93782795338255 | 2.90862130417191  |
| C | -3.78139483976450 | 2.87269027613388 | -4.21684595393231 |
| O | -3.04865352774986 | 3.50722045998285 | -3.25457629466474 |
| O | -2.71970682657766 | 4.20476020060871 | 1.71148507791392  |
| C | -1.62961756015259 | 3.28002760527496 | -3.23977492508583 |
| C | -1.32118984591997 | 3.89816243881601 | 1.57484161984831  |
| C | -1.03648141002614 | 4.02574583593061 | -2.06102670381108 |
| O | -1.67359665882178 | 3.66316302315285 | -0.82915826700674 |
| C | -0.88548440470083 | 4.30592496656400 | 0.18141229894953  |
| C | -5.42614877950536 | 3.92351185519691 | 4.15324438106035  |
| C | -2.65440976809242 | 3.47548458166767 | 4.05616203714237  |
| C | -4.74410142901799 | 3.47413134181856 | 5.30061311978663  |
| C | -6.03007396080395 | 2.39739259770097 | -5.06093626307719 |
| C | -3.24330318731555 | 2.10935156653359 | -5.26519638680456 |
| C | -5.47482633695328 | 1.64302003770326 | -6.11266885957019 |
| C | 0.47893349442109  | 3.85857033981600 | -1.79342450887830 |
| C | 0.58528057671458  | 4.05176405728851 | -0.23078625490108 |
| C | -4.08836564769231 | 1.49967601894980 | -6.21054136465791 |
| C | -3.36646256645515 | 3.24748311005079 | 5.24827267885274  |
| C | 1.28782459834030  | 2.55051270395681 | -2.03823967803701 |
| C | 1.44760528424684  | 2.83338478090910 | 0.21639462060762  |
| C | 0.69007322862825  | 1.22474172461749 | -1.47919638723474 |
| C | 0.79983448844070  | 1.42384253293883 | 0.09486960252873  |
| C | 2.41587568921965  | 2.76465085675804 | -0.99437001404071 |
| O | -0.53697500184031 | 0.83527052582247 | -2.03691091976515 |
| O | -0.33973918286085 | 1.22862623220234 | 0.88956888603581  |
| K | -4.27692948075120 | 3.05798635786835 | -0.55137715616517 |
| H | -7.28795853610410 | 3.93378172777137 | 1.95624488253657  |

|    |                   |                  |                   |
|----|-------------------|------------------|-------------------|
| H  | -6.94430654970387 | 5.58771833611724 | 2.58941387560052  |
| H  | -7.60230367271165 | 3.09825608968461 | -2.71410068561245 |
| H  | -7.42126995961794 | 4.44006988705985 | -3.90663294926175 |
| H  | -1.41549488717796 | 2.19582304564745 | -3.14790157302025 |
| H  | -1.16999256476639 | 3.68049682024819 | -4.17220431918233 |
| H  | -1.14448003478345 | 2.81399121192484 | 1.72705458258682  |
| H  | -0.72841689268308 | 4.48779845997298 | 2.31017434937001  |
| H  | -1.21989432270246 | 5.12090822753524 | -2.21545128368651 |
| H  | -1.06003913340982 | 5.40893780165801 | 0.08112650601080  |
| H  | -6.51168435658267 | 4.08512958537107 | 4.20005056590832  |
| H  | -1.57558889030917 | 3.27605856158397 | 4.02139770083521  |
| H  | -5.30635425860322 | 3.29299756108880 | 6.22853705179121  |
| H  | -7.12176856928296 | 2.49015558877679 | -4.98068191267260 |
| H  | -2.15637375926923 | 1.97330826516126 | -5.34147019042236 |
| H  | -6.14034958772692 | 1.16200132705985 | -6.84449155226589 |
| H  | 1.01467035832687  | 4.66989932746304 | -2.32772109617616 |
| H  | 1.17083948621743  | 4.96219974909445 | 0.01464315196223  |
| H  | -3.64565303759078 | 0.90242912888737 | -7.02160712682369 |
| H  | -2.82887168755202 | 2.88085897945894 | 6.13515461822791  |
| H  | 1.61943970243751  | 2.44545711951570 | -3.09067160653175 |
| H  | 1.92444386568584  | 2.99122469046569 | 1.20460105716279  |
| H  | 1.43593665481635  | 0.43862815795547 | -1.74749318513427 |
| H  | 1.58215161302193  | 0.71049726091440 | 0.44849749415830  |
| H  | 3.13061363226184  | 1.91794708028568 | -0.93947363528343 |
| H  | 2.99181421791592  | 3.69889149580554 | -1.15250461799527 |
| H  | -1.25246054205788 | 0.57995384569136 | -1.38648974352705 |
| H  | -1.11060503596228 | 0.77808359173701 | 0.44027822832560  |
| H  | -8.12672255225960 | 5.81747807799689 | 0.50106264151808  |
| H  | -6.43113457450580 | 6.38302843499068 | 0.26804141340185  |
| H  | -8.32091981435304 | 5.36957496035855 | -1.87243044723491 |
| H  | -6.63719724446330 | 5.97334865128535 | -2.09191506499466 |
| Br | -3.14575503365849 | 0.08085254809179 | -0.25725908231385 |

KF-DB18C6-2OH

69

Coordinates from ORCA-job geom-pbe

|   |                   |                  |                   |
|---|-------------------|------------------|-------------------|
| C | -6.68856232137549 | 4.76426702889050 | 1.79377033675008  |
| C | -7.07182342929911 | 5.38880414226122 | 0.47011433962100  |
| O | -5.29351607518091 | 4.49561545434406 | 1.78401665608869  |
| O | -6.90126514007525 | 4.45387449917759 | -0.58434219077594 |
| C | -7.24513787088926 | 4.99857380559324 | -1.84892298292820 |
| C | -4.69613388752170 | 4.10219905324395 | 2.96060813381792  |
| C | -7.01961976592283 | 3.97623339930655 | -2.94136470716897 |
| O | -5.62705063778033 | 3.71345562716810 | -3.03480202075861 |
| C | -5.16839567164928 | 2.98488011154910 | -4.10939630242518 |
| C | -3.27898395855292 | 3.95185050329552 | 2.90520804842430  |
| C | -3.75045601516787 | 2.88243879662681 | -4.21667719490708 |
| O | -3.03088057844243 | 3.53871809059471 | -3.26180219476669 |
| O | -2.69655926631784 | 4.24837814601879 | 1.70876737163748  |
| C | -1.60839221612708 | 3.32958718663523 | -3.24062103174320 |
| C | -1.28841361056997 | 3.99080685114858 | 1.56550348763767  |
| C | -1.01283129447712 | 4.09897096262948 | -2.07677898022708 |
| O | -1.67554148477615 | 3.80122128509647 | -0.84116016385995 |
| C | -0.85816678687743 | 4.40337678608885 | 0.16975094161379  |
| C | -5.38319021305535 | 3.84065734173047 | 4.15420247250707  |
| C | -2.59413125079052 | 3.51590009809787 | 4.05127884595496  |

|   |                   |                  |                   |
|---|-------------------|------------------|-------------------|
| C | -4.68001656572001 | 3.41903220335061 | 5.29968157120509  |
| C | -5.99172948375919 | 2.35473650323638 | -5.05280222893997 |
| C | -3.19947546747842 | 2.12967272244212 | -5.26665303758578 |
| C | -5.42337227720624 | 1.61448730334198 | -6.10790059792422 |
| C | 0.48857188607989  | 3.85846236783811 | -1.79510590260725 |
| C | 0.59391293736320  | 4.06227820871312 | -0.23448337831244 |
| C | -4.03413864740943 | 1.50162497040967 | -6.20933790917135 |
| C | -3.29368933541219 | 3.25348853953732 | 5.24394365029629  |
| C | 1.21227620053148  | 2.49734680338519 | -2.01996827489787 |
| C | 1.35245236970375  | 2.78646975868149 | 0.23432487002951  |
| C | 0.53256920450669  | 1.19940967218889 | -1.46568935135232 |
| C | 0.61196102494295  | 1.41179541570043 | 0.11207997127936  |
| C | 2.33437870315114  | 2.64396746732546 | -0.95872958425557 |
| O | -0.68527475973737 | 0.80358032843355 | -2.02615875616226 |
| O | -0.55539533535702 | 1.23887069446498 | 0.86371391708303  |
| K | -4.16800519392710 | 2.96811357564127 | -0.54755346915544 |
| H | -7.26765307981659 | 3.82728543715007 | 1.96381875618875  |
| H | -6.94221428143682 | 5.47978483876219 | 2.60868417801195  |
| H | -7.58462515532377 | 3.04016567223780 | -2.72238960077116 |
| H | -7.40397506243371 | 4.39476390407716 | -3.89967627368824 |
| H | -1.38509841110598 | 2.24559073532201 | -3.13496592863260 |
| H | -1.15278415019285 | 3.72174300327064 | -4.17862667854139 |
| H | -1.07988396837945 | 2.90982930385272 | 1.71934850279670  |
| H | -0.71342037270639 | 4.60209168177099 | 2.29739244327062  |
| H | -1.14808005253557 | 5.19524004927478 | -2.26734843733385 |
| H | -0.98076977022634 | 5.51370362945894 | 0.07552123212346  |
| H | -6.47498775088746 | 3.95458346125951 | 4.20281720556119  |
| H | -1.50734799799436 | 3.36595255716564 | 4.01412081337179  |
| H | -5.23195733455575 | 3.21210600496711 | 6.22844382037938  |
| H | -7.08501414796127 | 2.42433835077146 | -4.96897741495142 |
| H | -2.10995463159334 | 2.01895698294315 | -5.34647865162257 |
| H | -6.08026061755377 | 1.12148036016268 | -6.83966686312154 |
| H | 1.07386821946584  | 4.63180407171524 | -2.33393137643434 |
| H | 1.23859022199758  | 4.93311875290442 | 0.00767003733115  |
| H | -3.58062508518242 | 0.91580211105546 | -7.02285070115014 |
| H | -2.73865974708618 | 2.90977056975691 | 6.12934940709922  |
| H | 1.55483897759473  | 2.36842364853082 | -3.06672449671777 |
| H | 1.82406619015808  | 2.91858423716635 | 1.22944146606959  |
| H | 1.26517259187629  | 0.39382068166467 | -1.71183948901387 |
| H | 1.35069121296150  | 0.67005258064225 | 0.49906565514804  |
| H | 2.98816207070007  | 1.75085106207760 | -0.88617790605753 |
| H | 2.97444121320644  | 3.53686948503279 | -1.11183945843629 |
| H | -1.49723777806082 | 0.84647780207410 | -1.39964996875454 |
| H | -1.40907037076174 | 1.10696389718570 | 0.31672729517285  |
| H | -8.13768704761817 | 5.71781843403511 | 0.53021646307998  |
| H | -6.44742688011527 | 6.29657965994127 | 0.28850917575389  |
| H | -8.32004734275997 | 5.30178178196408 | -1.86258385914006 |
| H | -6.63429061330975 | 5.90938634712786 | -2.05844713387144 |
| F | -2.69021283378604 | 0.94693320049085 | -0.49201656714071 |

TS1-DB18C6-2OH

77

Coordinates from ORCA-job geom-pbe

|   |                   |                  |                  |
|---|-------------------|------------------|------------------|
| C | -6.78145389322402 | 4.29007078169414 | 1.62196197181538 |
| C | -7.20329597956466 | 5.08844502485439 | 0.40798326560415 |

|   |                   |                  |                   |
|---|-------------------|------------------|-------------------|
| O | -5.35057114661501 | 4.24522660981676 | 1.65649135129886  |
| O | -6.83230451664630 | 4.40404922530978 | -0.78268780575339 |
| C | -7.20649445684109 | 5.08430828234106 | -1.96671518783464 |
| C | -4.73908088924865 | 3.78742714846642 | 2.79784519472347  |
| C | -6.97710830239554 | 4.18559786636733 | -3.16411161100432 |
| O | -5.58298565106853 | 3.90507404304153 | -3.26615744667155 |
| C | -5.14185705822250 | 3.17473590521538 | -4.34376779072659 |
| C | -3.31352901092145 | 3.77590972084359 | 2.77680153919828  |
| C | -3.73743151592947 | 2.93273924783333 | -4.38893496791460 |
| O | -3.00867996299607 | 3.46971559003976 | -3.36297771601038 |
| O | -2.72270015696751 | 4.18980024234148 | 1.60877093198319  |
| C | -1.59739873622231 | 3.21009548251656 | -3.32771012267413 |
| C | -1.31080428103240 | 3.98114740915787 | 1.48249817043319  |
| C | -1.01000087827451 | 3.97457687176337 | -2.15797736590068 |
| O | -1.65632366476852 | 3.64224634947772 | -0.92045320136659 |
| C | -0.88596635712799 | 4.34002058455086 | 0.07145279392225  |
| C | -5.41878656088239 | 3.33243135211812 | 3.93758883319610  |
| C | -2.61140138447555 | 3.33832367469301 | 3.91146824075899  |
| C | -4.70239538938831 | 2.89824523047258 | 5.06804634803880  |
| C | -5.96853072691829 | 2.66581351082025 | -5.35572592035061 |
| C | -3.20307011541349 | 2.17486242194255 | -5.44243414040200 |
| C | -5.41753810280865 | 1.91532003067657 | -6.41244167295665 |
| C | 0.49577425360443  | 3.80462615372358 | -1.87062523216733 |
| C | 0.58731313002062  | 4.07130509333451 | -0.31766351840491 |
| C | -4.04252822846592 | 1.66987256608253 | -6.45319536875785 |
| C | -3.30495547954561 | 2.90694502637851 | 5.05749188374427  |
| C | 1.26673535588809  | 2.46527612582773 | -2.04248220470157 |
| C | 1.41836795063111  | 2.85966414233629 | 0.19736646809543  |
| C | 0.63424789094630  | 1.17790525576300 | -1.42208158056857 |
| C | 0.76722545593979  | 1.44065789182963 | 0.13959967479745  |
| C | 2.39303764157712  | 2.70473020722202 | -1.00127174547326 |
| O | -0.61456122595477 | 0.75724159255581 | -1.91490065705093 |
| O | -0.34729557980404 | 1.17762444132251 | 0.95178954002246  |
| K | -4.28347887979514 | 3.13587239884181 | -0.74807913401840 |
| H | -7.18782279878214 | 3.25160485869266 | 1.58477601166833  |
| H | -7.17242390902038 | 4.80638017949223 | 2.52682017226269  |
| H | -7.55149740526224 | 3.23885559834813 | -3.04777350781158 |
| H | -7.33757834119120 | 4.70730753319122 | -4.07971764544134 |
| H | -1.40686187706685 | 2.12179197776615 | -3.22316980344007 |
| H | -1.11663147833300 | 3.58429331685548 | -4.25987846649887 |
| H | -1.05531458109034 | 2.92649071126573 | 1.71001540054862  |
| H | -0.75747460157470 | 4.64706859145301 | 2.18422427364018  |
| H | -1.19067224073989 | 5.06491884674712 | -2.34144409774114 |
| H | -1.07435852908312 | 5.43422295576587 | -0.07732595031318 |
| H | -6.51537345293663 | 3.28020574406216 | 3.94078226116309  |
| H | -1.51353785659531 | 3.32140847379396 | 3.90571819626145  |
| H | -5.25308247580572 | 2.53708577676165 | 5.94901514756049  |
| H | -7.05161464442215 | 2.84454963271341 | -5.32705087712512 |
| H | -2.12628884606354 | 1.96193682510046 | -5.47401715807211 |
| H | -6.07953233777009 | 1.51918854779519 | -7.19640532037662 |
| H | 1.05322111157903  | 4.57623818983950 | -2.43990636864954 |
| H | 1.17895918655856  | 4.98608956333119 | -0.10619659176120 |
| H | -3.60600914838660 | 1.07590463834111 | -7.26996546658848 |
| H | -2.73738052442129 | 2.56297188832703 | 5.93485428269875  |
| H | 1.60424633411408  | 2.29922399081394 | -3.08510229718342 |
| H | 1.89300121625346  | 3.05740725890542 | 1.17915230856508  |
| H | 1.34504686887953  | 0.36045549613139 | -1.68040509359542 |
| H | 1.56523223017803  | 0.76111145413212 | 0.51326819816354  |

|    |                   |                   |                   |
|----|-------------------|-------------------|-------------------|
| H  | 3.08827559148654  | 1.84660286248751  | -0.89685192296434 |
| H  | 2.99115411327668  | 3.61593357597551  | -1.20425465774400 |
| H  | -1.36461762729960 | 0.85517280920548  | -1.27179809967320 |
| H  | -1.21597028854343 | 1.11930147475670  | 0.46684552133235  |
| H  | -4.80975159398612 | 0.34731983405766  | -0.38064278761986 |
| H  | -4.63067275741366 | -1.48512663390402 | 1.74267746791339  |
| C  | -4.29896568562308 | 0.27505361065071  | 0.58276916365228  |
| F  | -2.71596998780275 | 0.92913581891766  | -0.22201149814972 |
| C  | -3.84622742115083 | -1.05059219129950 | 1.09163617995417  |
| Br | -6.89520645015252 | 0.44861424986148  | 1.21324062224925  |
| H  | -3.64803587736898 | -1.75469377138244 | 0.26207517690863  |
| H  | -4.32576661983721 | 1.12640767349285  | 1.26906396499035  |
| H  | -2.92719126983160 | -0.92895642405499 | 1.69858154973912  |
| H  | -8.31096493898708 | 5.22252442900249  | 0.44383727518192  |
| H  | -6.73522826446989 | 6.10191808799491  | 0.43121526418916  |
| H  | -8.28978311446151 | 5.35323114346666  | -1.94052993073288 |
| H  | -6.62713325394121 | 6.03299789957288  | -2.07737271408405 |

DB18C6-4OH

84

Coordinates from ORCA-job geom-pbe

|   |                   |                   |                   |
|---|-------------------|-------------------|-------------------|
| C | 0.67763367716137  | -0.69380337437335 | 3.96620588352354  |
| C | -0.74616812526175 | -0.81322028923866 | 3.93942056543259  |
| O | -1.25065263323469 | -1.53953977805465 | 2.90176833738830  |
| C | -2.87479839999595 | -2.19859719776781 | 1.31568629674134  |
| O | -2.48213125999667 | -1.35796932682450 | 0.21206276512941  |
| C | -2.83497277231589 | -2.15443195813863 | -0.94322443178978 |
| C | -2.52679853755024 | -1.43814034702959 | -2.24305701426209 |
| O | 1.33564233262467  | -1.32862361601316 | 2.95819737049899  |
| C | 2.73162264401421  | -1.09865889783111 | 2.78857979665494  |
| O | -1.11355438529622 | -1.49101008622463 | -2.41942737398146 |
| C | -0.54782515114395 | -0.76854922541261 | -3.42486915778732 |
| C | 0.87799304546840  | -0.67662763434769 | -3.38979387595433 |
| C | 3.12605478829853  | -1.76147569618335 | 1.48389388832668  |
| O | 2.68706321081345  | -0.99655413608824 | 0.33682349756359  |
| C | 3.17712911600621  | -1.77264814346518 | -0.77451730806690 |
| C | 2.86510567518383  | -1.12412020253653 | -2.11192589432762 |
| O | 1.47712307319548  | -1.31631729961224 | -2.34586204363238 |
| C | -1.51144222732489 | -0.20191019466146 | 4.94365744493553  |
| C | -0.88465730842165 | 0.53092599511397  | 5.97170056565958  |
| C | 0.50730542462242  | 0.65357309858288  | 5.99472131484052  |
| C | 1.28837471380232  | 0.04312014403356  | 4.99320623007039  |
| C | 1.55068159587376  | 0.03892835891021  | -4.39172237840576 |
| C | 0.82927249672493  | 0.66604754133793  | -5.42739018295189 |
| C | -0.56524861186954 | 0.58106319539064  | -5.45950953461662 |
| C | -1.25372050614627 | -0.13393960454973 | -4.45901971058303 |
| C | -4.29260587949073 | -2.66468696476166 | 0.93711248913252  |
| C | -4.25622744460500 | -2.70939812889788 | -0.63985155408297 |
| C | 4.60356208172216  | -2.14374599004306 | 1.17897508920152  |
| C | 4.64006885035715  | -2.07113160691842 | -0.39760689241474 |
| C | -5.56151688677457 | -1.81842946969690 | 1.21833947292180  |
| C | -5.60862691445120 | -2.04374666081590 | -1.05511311150887 |
| C | -6.49563256860701 | -2.45635344764231 | 0.15384849039737  |
| C | -5.51267273054781 | -0.34671985942296 | 0.69579152623088  |
| C | -5.72565400887340 | -0.51691891043220 | -0.86239476737478 |
| O | -4.37529299411469 | 0.44988972378978  | 0.97186002274946  |
| O | -4.86906620926158 | 0.30663153566335  | -1.62034922219217 |

|   |                   |                   |                   |
|---|-------------------|-------------------|-------------------|
| C | 5.86761025441015  | -1.33225293952454 | 1.61135105509056  |
| C | 5.80261723289280  | -1.07885515094711 | -0.65882430205564 |
| C | 6.80052562986688  | -1.62014700085278 | 0.40093606367080  |
| C | 5.57654892823373  | 0.36815717957352  | -0.11416377861335 |
| C | 5.80700334040607  | 0.20061931876131  | 1.44214230218166  |
| O | 4.86034593572974  | 0.90961956826215  | 2.20885959011018  |
| O | 4.34929885211989  | 1.02164268094771  | -0.37892287910081 |
| H | -6.77961164900585 | -0.25328400704283 | -1.11490602901616 |
| H | 6.35453647390586  | 1.02985123025547  | -0.54627276250932 |
| C | -2.65048578979674 | -1.53066996790196 | 2.66143566799712  |
| H | -2.21112600268859 | -3.09556773376077 | 1.30146010230165  |
| H | -2.15379840243049 | -3.03830078842999 | -0.92717473477897 |
| H | -2.89470387889829 | -0.39508314621244 | -2.22672311212106 |
| H | -3.04932047607934 | -1.96640705586605 | -3.07475284951054 |
| H | 3.31177386397714  | -1.56411055865275 | 3.61923784947350  |
| H | 2.96898494781570  | -0.01758038299834 | 2.78075490482608  |
| H | 2.55246590302329  | -2.71762722376758 | 1.45219343319794  |
| H | 2.62732432332752  | -2.74321423174990 | -0.76586714813731 |
| H | 3.47224384099531  | -1.62760205279098 | -2.90133680887782 |
| H | 3.12750310195375  | -0.04456052486818 | -2.11486449219756 |
| H | -2.60684829475437 | -0.29189113514244 | 4.93059467223713  |
| H | -1.49989391614041 | 1.00621163047488  | 6.75037773152834  |
| H | 1.00397186865606  | 1.22774176663407  | 6.79147417046634  |
| H | 2.38212661602892  | 0.15135741678752  | 5.01464184644932  |
| H | 2.64688041471537  | 0.11786758097321  | -4.36839147000996 |
| H | 1.37319650415807  | 1.22394919364469  | -6.20451197965755 |
| H | -1.13572992662672 | 1.07195378856726  | -6.26229947905650 |
| H | -2.35103567985334 | -0.19175144990197 | -4.48984026599215 |
| H | -4.46641994220847 | -3.67160565525735 | 1.36946502932609  |
| H | -4.29122570251367 | -3.75561321609835 | -1.00475548336020 |
| H | 4.75804943335162  | -3.18429900718536 | 1.53034699103026  |
| H | 4.93143201571431  | -3.04431458603299 | -0.84354537831104 |
| H | -5.90390238558959 | -1.88716111256307 | 2.26956754654669  |
| H | -5.96289324108129 | -2.38202775578888 | -2.04827997354478 |
| H | -7.51141952759447 | -2.01223030193857 | 0.12165424606780  |
| H | -6.59988472375896 | -3.55310787994273 | 0.27471453148207  |
| H | -3.57472714703450 | -0.02857275427611 | 0.62134523930145  |
| H | -4.51894114644259 | 0.97179610054075  | -0.98479517451566 |
| H | 6.25544623457164  | -1.64250638330387 | 2.60108676097884  |
| H | 6.15552182192204  | -1.09137540689314 | -1.70873446869081 |
| H | 7.03232932539235  | -2.69507865018849 | 0.26411536161359  |
| H | 7.75817307213212  | -1.06235312119584 | 0.44474316187409  |
| H | 4.42669897940326  | 1.52820789622047  | 1.57704631591070  |
| H | 3.61398892436582  | 0.43894459376906  | -0.03997693050538 |
| H | -3.18974698552247 | -2.11929899041476 | 3.44153903168651  |
| H | -3.05397385920553 | -0.49618421284889 | 2.67581453578335  |
| H | 6.82260949632342  | 0.58122557812889  | 1.70169223592924  |
| H | -6.36497582875238 | 0.20738731496012  | 1.13910253003501  |

KBr-DB18C6-4OH

86

Coordinates from ORCA-job geom-pbe

|   |                   |                  |                   |
|---|-------------------|------------------|-------------------|
| C | -6.49809691081012 | 4.20370811485258 | 1.85195718307390  |
| C | -7.01856791586516 | 4.62142110631324 | 0.49239935416511  |
| O | -5.08037901475380 | 4.33819739646087 | 1.80723544724753  |
| O | -6.51013646140382 | 3.77431647341239 | -0.56324040159804 |

|    |                    |                   |                   |
|----|--------------------|-------------------|-------------------|
| C  | -7.16265732118145  | 4.31855274508749  | -1.73945905638820 |
| C  | -4.37984269702455  | 4.21937897413797  | 2.97985880835673  |
| C  | -6.78807442177555  | 3.56642811745817  | -2.99544255579033 |
| O  | -5.38033803574217  | 3.74111457911984  | -3.17490199109207 |
| C  | -4.83377823035366  | 3.39216498413190  | -4.38255599973539 |
| C  | -2.96963387520017  | 4.40143007935188  | 2.87950340902833  |
| C  | -3.43603875438196  | 3.63382929347349  | -4.52316217803996 |
| O  | -2.79659314482661  | 4.17518637089018  | -3.43761064219267 |
| O  | -2.47644602279044  | 4.67835174118974  | 1.63115464313152  |
| C  | -1.36893064633452  | 4.12850492759714  | -3.46793895013765 |
| C  | -1.05709309282170  | 4.59436197356667  | 1.48666946444688  |
| C  | -0.75172405403477  | 4.67921155399539  | -2.18146274101968 |
| O  | -1.49549810926538  | 4.43621994951493  | -0.97865639955924 |
| C  | -0.61119386011723  | 4.88934474718272  | 0.05532013379518  |
| C  | -4.95987110333702  | 3.92419606674586  | 4.22260569808198  |
| C  | -2.18591838404081  | 4.28157416576845  | 4.03933362760476  |
| C  | -4.16060170609288  | 3.81446761929289  | 5.37587466796466  |
| C  | -5.55354103303813  | 2.81960729104982  | -5.44216508143270 |
| C  | -2.80785220411488  | 3.30325467662055  | -5.73530155224271 |
| C  | -4.90941162754904  | 2.49917043837641  | -6.65165847866402 |
| C  | 0.66842737083731   | 4.14335534190219  | -1.87853656883877 |
| C  | 0.76569211324176   | 4.28834538174408  | -0.31604109389626 |
| C  | -3.54220692492436  | 2.74396748096188  | -6.79755394310351 |
| C  | -2.77882782562127  | 3.99426452113607  | 5.28300011844189  |
| C  | 1.07861007987823   | 2.65816115969119  | -2.12465215886450 |
| C  | 1.21858069500663   | 2.86774721920566  | 0.14552146019537  |
| C  | 0.09499421216445   | 1.57034079242671  | -1.61587585103719 |
| C  | 0.19145035038704   | 1.71656469838776  | -0.03418329277565 |
| C  | -8.53613157157879  | 4.66914979355112  | 0.23806798308473  |
| C  | 2.17172674552796   | 2.52411538516869  | -1.03100511298471 |
| C  | -8.64616357711410  | 4.51007509828217  | -1.33013905307522 |
| C  | -9.52244870448834  | 3.59002427927807  | 0.75601229744550  |
| C  | -9.78870098829545  | 3.45964036409235  | -1.51113509109541 |
| C  | -9.13522740240155  | 2.11402029365600  | 0.42089273640720  |
| C  | -9.47048981895533  | 2.00030503993150  | -1.12151065231816 |
| C  | -10.66337720093595 | 3.80903397779208  | -0.27365157958410 |
| O  | -7.82572289667671  | 1.66564365392124  | 0.70301062795529  |
| O  | -8.46112996841725  | 1.35026595393724  | -1.86152004021745 |
| O  | -1.20726046865296  | 1.64472495633260  | -2.13889574615978 |
| O  | -1.03963204388178  | 1.90108572366813  | 0.61963039051622  |
| K  | -3.69433938700986  | 3.04235932118549  | -0.73387700153284 |
| Br | -3.23874397969198  | -0.18062551767898 | -0.45259411675453 |
| H  | -6.78888375851055  | 3.16431618230340  | 2.11436705273116  |
| H  | -6.93414548682855  | 4.89414838629454  | 2.60999999737092  |
| H  | -6.61606046464853  | 5.64581207908838  | 0.30179546028098  |
| H  | -6.74272842343095  | 5.34623431501432  | -1.86528896667996 |
| H  | -7.05769776056542  | 2.49413791161143  | -2.93104337647733 |
| H  | -7.34886514422953  | 4.02502357179947  | -3.84153021699791 |
| H  | -1.06406642173610  | 3.07941834484427  | -3.63546072676958 |
| H  | -0.98215401479048  | 4.76004017079206  | -4.30025516754185 |
| H  | -0.73910512585342  | 3.58377799771769  | 1.80192522005887  |
| H  | -0.56159836791645  | 5.35398440301641  | 2.13405083056660  |
| H  | -0.67296627779419  | 5.79164196294663  | -2.28103715419705 |
| H  | -0.53213718614125  | 6.00051402964925  | -0.06262022933695 |
| H  | -6.04242481072279  | 3.75505779694823  | 4.30091003095024  |
| H  | -1.09790205021118  | 4.40934453425944  | 3.98108191673621  |
| H  | -4.63163175789334  | 3.57394133394339  | 6.34025012602042  |
| H  | -6.62240594924157  | 2.59690184088734  | -5.32506587372657 |



|   |                    |                  |                   |
|---|--------------------|------------------|-------------------|
| H | -1.73216010061027  | 3.47986682744726 | -5.86258948290719 |
| H | -5.48851683779493  | 2.04742414175701 | -7.47054950399346 |
| H | 1.41637603432674   | 4.78230919031544 | -2.39145640552974 |
| H | 1.56493439056143   | 5.00147593356600 | -0.02595455260655 |
| H | -3.02683414793203  | 2.49176185357989 | -7.73618610266237 |
| H | -2.14272063109061  | 3.90213146225509 | 6.17577070647293  |
| H | 1.41871060183034   | 2.47481938641116 | -3.16377505572136 |
| H | 1.68498825744128   | 2.87313608620964 | 1.15094070245468  |
| H | 0.54991386890926   | 0.58998054424950 | -1.89631749289273 |
| H | 0.68548365256180   | 0.79832696591924 | 0.36386308679084  |
| H | -8.92130751562193  | 5.65473751577198 | 0.57001660994642  |
| H | 2.60822491206518   | 1.50637829372287 | -0.96462555353797 |
| H | 3.00123311197456   | 3.25006141288451 | -1.14963735824592 |
| H | -9.00189155923462  | 5.45074075357250 | -1.79679138244617 |
| H | -9.79581395434084  | 3.73065642096930 | 1.82026746185925  |
| H | -10.29313133121784 | 3.54393432070812 | -2.49339564452567 |
| H | -9.79938341763493  | 1.44489756466247 | 1.00406977025522  |
| H | -10.42161398975352 | 1.43044909924835 | -1.24335665115550 |
| H | -11.52329371509607 | 3.12224984052573 | -0.14055960950380 |
| H | -11.04758171076892 | 4.84866563061255 | -0.28144371324685 |
| H | -1.76222528614333  | 0.90190146885493 | -1.75850517861132 |
| H | -1.62577600372642  | 1.10555438619555 | 0.45490361641653  |
| H | -7.96132546519890  | 0.78797870814737 | -1.22911771563717 |
| H | -7.20186634453302  | 2.21184902713354 | 0.16363980522766  |

KF-DB18C6-4OH

86

Coordinates from ORCA-job geom-pbe

|   |                    |                  |                   |
|---|--------------------|------------------|-------------------|
| C | -6.59646655392257  | 4.23951259895545 | 1.84618995148720  |
| C | -7.05133481872029  | 4.72081307932452 | 0.48117116697400  |
| O | -5.17446455611709  | 4.20787838893396 | 1.81431501763058  |
| O | -6.63972378261462  | 3.81561847650770 | -0.57165823539873 |
| C | -7.21742759605456  | 4.42777501547838 | -1.75708198982031 |
| C | -4.49588143982304  | 3.91465204155080 | 2.97370655295488  |
| C | -6.91233553047469  | 3.62596874161984 | -3.00323292927232 |
| O | -5.49397109944145  | 3.65457331188362 | -3.16334314797729 |
| C | -4.95358673878056  | 3.10644953936699 | -4.30172449182049 |
| C | -3.07317394660344  | 3.94862890221386 | 2.87514021513498  |
| C | -3.53331103993469  | 3.18981402137298 | -4.40809362388442 |
| O | -2.88812525586011  | 3.82180220342603 | -3.38309326264464 |
| O | -2.56384589219207  | 4.30293327005586 | 1.65928846412587  |
| C | -1.45157421033479  | 3.75485180978319 | -3.36630910316364 |
| C | -1.13907187250930  | 4.20784706665887 | 1.48130509069384  |
| C | -0.92575544990314  | 4.50617025728062 | -2.15773186629235 |
| O | -1.53727078742505  | 4.07291258273856 | -0.93484602421586 |
| C | -0.77508342271503  | 4.71209658852371 | 0.09684827037416  |
| C | -5.10827502055530  | 3.58259885171529 | 4.19005018767086  |
| C | -2.30641888967357  | 3.61806294294733 | 4.00466085407091  |
| C | -4.32453052117317  | 3.27045227726694 | 5.31785119765256  |
| C | -5.697414711335300 | 2.48290587637862 | -5.31365736865454 |
| C | -2.90112371251805  | 2.62693880542589 | -5.52902306570989 |
| C | -5.04879957995176  | 1.93728855165423 | -6.43835918371257 |
| C | 0.59584264945875   | 4.40042028948390 | -1.89942022681551 |
| C | 0.70085494646377   | 4.54221115715351 | -0.33296770216921 |
| C | -3.65717148632436  | 2.00757078124399 | -6.54168032524215 |
| C | -2.93074051424102  | 3.28385356405955 | 5.22110407621875  |

|   |                    |                  |                   |
|---|--------------------|------------------|-------------------|
| C | 1.44224518505522   | 3.12635241016525 | -2.19265692583083 |
| C | 1.59574679036089   | 3.33346553730791 | 0.07000137147773  |
| C | 0.89160283058456   | 1.75111606518583 | -1.68534709149613 |
| C | 0.99670678595468   | 1.89777954524959 | -0.10017681426688 |
| C | -8.54958204774861  | 4.94232051722071 | 0.21349966134124  |
| C | 2.56395665408426   | 3.33791587477201 | -1.14206732057758 |
| C | -8.66921461270723  | 4.79926690371407 | -1.35633637920249 |
| C | -9.65401678629369  | 3.98091697408235 | 0.72416687049915  |
| C | -9.93284163107981  | 3.89694675191932 | -1.54458711474593 |
| C | -9.44310465971559  | 2.47323926680461 | 0.37690079598523  |
| C | -9.79815831430078  | 2.40812460117889 | -1.16310895927797 |
| C | -10.76093600717007 | 4.34043600627264 | -0.30415007636175 |
| O | -8.18911253480378  | 1.87139498654853 | 0.64032999178722  |
| O | -8.88047493909161  | 1.63512165809731 | -1.90487167062952 |
| O | -0.30850083881225  | 1.29553644933819 | -2.24110906313480 |
| O | -0.11748478007137  | 1.57420141163052 | 0.68019736590748  |
| K | -3.87104537864189  | 2.91558752898309 | -0.67686046650947 |
| F | -2.23169461486908  | 1.04288412298575 | -0.60933069459326 |
| H | -7.01469508619850  | 3.24033000043490 | 2.09490761447447  |
| H | -6.95756256960308  | 4.96836428429349 | 2.60827858657098  |
| H | -6.52665694099826  | 5.68874183864437 | 0.29451238362635  |
| H | -6.67698587935541  | 5.39652132669079 | -1.88426570835048 |
| H | -7.29542876427397  | 2.58934577326374 | -2.92839570647672 |
| H | -7.41517864139845  | 4.12333829491807 | -3.86468077261746 |
| H | -1.12226173348896  | 2.69392030354628 | -3.32271005189709 |
| H | -1.03559836432994  | 4.24711443510210 | -4.27486952270255 |
| H | -0.81174268463258  | 3.15195287942508 | 1.60270308235240  |
| H | -0.61908163584361  | 4.85692332063685 | 2.22178823284880  |
| H | -1.17141009480877  | 5.59309356901996 | -2.27882530480021 |
| H | -1.01265552657429  | 5.80651114866312 | 0.04666790571869  |
| H | -6.20415477870861  | 3.54974778918382 | 4.26775007825704  |
| H | -1.21085151277898  | 3.60766382312209 | 3.93637023375313  |
| H | -4.81830632573803  | 3.00463786426098 | 6.26412594400964  |
| H | -6.78991610342342  | 2.40304919561915 | -5.22793933517007 |
| H | -1.80692335627215  | 2.65942274249200 | -5.61394064374938 |
| H | -5.64479011265464  | 1.44898670584902 | -7.22364177928281 |
| H | 1.09650687895440   | 5.25035594067434 | -2.40804405319203 |
| H | 1.25236222176974   | 5.46459066181924 | -0.05413834124189 |
| H | -3.14013334216727  | 1.57267612314885 | -7.41000551239639 |
| H | -2.30995908749529  | 3.02489613071050 | 6.09155189371601  |
| H | 1.77652220745139   | 3.07438652414111 | -3.24853661901085 |
| H | 2.07040590744181   | 3.47122988017297 | 1.06279920848947  |
| H | 1.67922644131089   | 1.01869404641992 | -1.98620385041808 |
| H | 1.82255799916097   | 1.21994266846328 | 0.22450956580116  |
| H | -8.82265517171587  | 5.96436141161576 | 0.54670762881888  |
| H | 3.30363432140200   | 2.51113630569394 | -1.11691962563351 |
| H | 3.11280203603062   | 4.29388398931614 | -1.26740317739646 |
| H | -8.90406471984278  | 5.77660792017089 | -1.82376418389606 |
| H | -9.91056958765142  | 4.14418573641651 | 1.78926568424397  |
| H | -10.42205321043623 | 4.04838505990157 | -2.52641710313191 |
| H | -10.17301159370319 | 1.87870401373366 | 0.96192585102741  |
| H | -10.81319570619025 | 1.96204705832901 | -1.28245930682059 |
| H | -11.69739503382106 | 3.76119924120180 | -0.17688641121320 |
| H | -11.01786209714375 | 5.41820476095428 | -0.30348138792487 |
| H | -1.07996967639793  | 1.16999465394822 | -1.57918233878366 |
| H | -0.96517254768407  | 1.33859706005187 | 0.15703767105210  |
| H | -8.44062710860933  | 1.04043467425581 | -1.25783611872162 |
| H | -7.50678928502131  | 2.37552323923379 | 0.12883331150133  |

TS1-DB18C6-4OH

94

Coordinates from ORCA-job geom-pbe

|   |                    |                  |                   |
|---|--------------------|------------------|-------------------|
| C | -6.70589688536659  | 4.56995900545879 | 1.85855035555169  |
| C | -7.24221355041841  | 4.95594580357920 | 0.49442406287440  |
| O | -5.27201563986463  | 4.63783091870507 | 1.84073373767679  |
| O | -6.65594773511573  | 4.20199103967973 | -0.57354262672510 |
| C | -7.39830102346008  | 4.60893363228788 | -1.73001876136770 |
| C | -4.62346410449035  | 4.34126250347822 | 3.01306458624574  |
| C | -7.04074468669923  | 3.81931095885400 | -2.97377289248131 |
| O | -5.61774011507574  | 3.85193208320918 | -3.16157941350999 |
| C | -5.12321124966508  | 3.22097783790729 | -4.27521619676559 |
| C | -3.20668872521089  | 4.19145286794494 | 2.93688242879687  |
| C | -3.70545728445892  | 3.07707509238183 | -4.34745890615598 |
| O | -2.98522974066157  | 3.58963506336904 | -3.29825766390322 |
| O | -2.64035875126421  | 4.36435368942843 | 1.69924025697731  |
| C | -1.58163937240629  | 3.29685162535119 | -3.26575374687785 |
| C | -1.25056039941789  | 4.03386249969023 | 1.56718728212710  |
| C | -0.95814329124407  | 3.99704656630162 | -2.07541730706950 |
| O | -1.61970437102590  | 3.68765836644776 | -0.83921290833949 |
| C | -0.80440031211904  | 4.33363958564599 | 0.15056575341774  |
| C | -5.26637070185073  | 4.16746954072870 | 4.24959490627511  |
| C | -2.48530486385952  | 3.86638902319615 | 4.09740129597154  |
| C | -4.52919107950064  | 3.85361823180365 | 5.40620575474740  |
| C | -5.91891922541288  | 2.70868342329929 | -5.31303975671408 |
| C | -3.13542732829825  | 2.42238773463299 | -5.45154451018987 |
| C | -5.33265953117162  | 2.06656686398192 | -6.41954297097553 |
| C | 0.53385364276427   | 3.71710871329789 | -1.79307110863923 |
| C | 0.64254749161668   | 3.95186914759838 | -0.23575254522386 |
| C | -3.94513627754046  | 1.92289848333360 | -6.48816312285900 |
| C | -3.14299919882942  | 3.70193985919291 | 5.33021271421875  |
| C | 1.20038703152509   | 2.32430275486081 | -1.98485465141050 |
| C | 1.35740364880415   | 2.66363046128255 | 0.26352606361199  |
| C | 0.46770115287528   | 1.07700793672666 | -1.39492788572336 |
| C | 0.57270084280611   | 1.31606054070476 | 0.17220377436963  |
| C | -8.76951931440964  | 4.83571464042241 | 0.27473809549907  |
| C | 2.32984585808468   | 2.44905672730430 | -0.92777347424833 |
| C | -8.87925435615852  | 4.59360368477763 | -1.27978674380148 |
| C | -9.67042811007792  | 3.71198363451350 | 0.87285901584736  |
| C | -9.83051066075620  | 3.36112224795176 | -1.38028548415313 |
| C | -9.18120706446229  | 2.25068025675745 | 0.71384452572444  |
| C | -9.29208105581006  | 2.00652445866685 | -0.85558812152688 |
| C | -10.78841840889111 | 3.70592491615493 | -0.20580196654885 |
| O | -7.92290363977494  | 1.98306026214397 | 1.27852807713087  |
| O | -8.11752570919766  | 1.55295382356742 | -1.47933117946954 |
| O | -0.78416462293013  | 0.72365918511650 | -1.92901663251906 |
| O | -0.59676692396433  | 1.18378606137451 | 0.94205819216780  |
| K | -4.20845770146803  | 3.26212804787201 | -0.59040449639141 |
| H | -7.02520062102556  | 3.54585984740286 | 2.13145438008270  |
| H | -7.11722373792292  | 5.30114537339885 | 2.59128357435961  |
| H | -6.97408022576780  | 6.03005601987839 | 0.31918546646730  |
| H | -7.13252917653522  | 5.68022488571370 | -1.92395244700556 |
| H | -7.37859776522944  | 2.76856493764027 | -2.88661887676669 |
| H | -7.55378715460413  | 4.31036730801620 | -3.83183247594840 |
| H | -1.42493023209040  | 2.20015518225157 | -3.20903670626161 |

|    |                    |                   |                   |
|----|--------------------|-------------------|-------------------|
| H  | -1.08274678547407  | 3.69432700382957  | -4.17884550754516 |
| H  | -1.08967151862174  | 2.96539779141749  | 1.81685066991099  |
| H  | -0.63743538332133  | 4.66872647582148  | 2.24666427682225  |
| H  | -1.06550310449421  | 5.10050356326832  | -2.23450561977554 |
| H  | -0.90924236532657  | 5.43724385778142  | -0.01103960849623 |
| H  | -6.35735122572820  | 4.26636308084292  | 4.32003692387089  |
| H  | -1.39850340446995  | 3.72261270172351  | 4.04513967779880  |
| H  | -5.05628282322543  | 3.71696662709114  | 6.36213799981168  |
| H  | -7.01169728367872  | 2.79853956205146  | -5.26237318885618 |
| H  | -2.04791187623784  | 2.28231400959105  | -5.50597535666675 |
| H  | -5.97682520628614  | 1.67126410429566  | -7.21883495933493 |
| H  | 1.14687266842556   | 4.45411047880825  | -2.35092340527858 |
| H  | 1.30974143106773   | 4.80854401720817  | -0.00695367631481 |
| H  | -3.47586345691299  | 1.41234670448993  | -7.34233303522552 |
| H  | -2.55792531013326  | 3.44215299932270  | 6.22464807428039  |
| H  | 1.53467998640280   | 2.15111991745608  | -3.02728974072122 |
| H  | 1.83580061185727   | 2.79901277380911  | 1.25412778466399  |
| H  | 1.14009529495910   | 0.22316786679974  | -1.63807710180958 |
| H  | 1.27942086624253   | 0.55406227875082  | 0.57202560264817  |
| H  | -9.23839250218591  | 5.80055195064784  | 0.55821552336809  |
| H  | 2.94867298929052   | 1.53374176288801  | -0.83227668733568 |
| H  | 3.00358651034468   | 3.31119574836233  | -1.10554065105338 |
| H  | -9.40123320673682  | 5.43778667991489  | -1.77462888505964 |
| H  | -10.00069830793016 | 3.94070611678002  | 1.90568045973124  |
| H  | -10.30653992466351 | 3.27300266558496  | -2.37722761840972 |
| H  | -9.95018879130581  | 1.61239355961354  | 1.21053252860354  |
| H  | -10.10820136862552 | 1.26349345239573  | -1.02597275735366 |
| H  | -11.56756696065177 | 2.93632027209121  | -0.02991554455272 |
| H  | -11.28926609574771 | 4.68791550397105  | -0.32264699745996 |
| H  | -1.55797937276019  | 0.87485656570465  | -1.32177041616316 |
| H  | -1.43787831290069  | 1.12409856992914  | 0.41637606674789  |
| H  | -7.82952902909196  | 0.69870780869991  | -1.06410154965673 |
| H  | -7.67469749976309  | 1.03838354336452  | 1.10486763793449  |
| H  | -4.85265301246646  | 0.09062550060237  | -1.07573309961751 |
| H  | -4.30303222235306  | -2.32492048608531 | -0.55600735616115 |
| C  | -4.47611517213403  | -0.22879787408759 | -0.09854339957508 |
| F  | -2.94846123194915  | 0.94680511176991  | -0.36182146850197 |
| C  | -3.79133551374649  | -1.54737902237624 | 0.04169615331802  |
| Br | -6.94822025574778  | -1.01428287611256 | 0.24907686893599  |
| H  | -2.75916036795641  | -1.44917559597931 | -0.35346948079471 |
| H  | -4.72396683831237  | 0.37989841524086  | 0.77553586200195  |
| H  | -3.73656237062260  | -1.87648654256461 | 1.09508628070205  |

(KF-DB18C6-4OH) 2

172

Coordinates from ORCA-job geom-pbe E -5534.807377736982

|   |           |           |           |
|---|-----------|-----------|-----------|
| C | -3.401268 | -3.051398 | 2.117303  |
| C | -3.163873 | -3.830905 | 0.840633  |
| O | -4.821652 | -3.068393 | 2.339664  |
| O | -3.823228 | -3.193918 | -0.260171 |
| C | -3.399787 | -3.932092 | -1.410822 |
| C | -5.319506 | -2.512796 | 3.484236  |
| C | -3.900791 | -3.270969 | -2.677379 |
| O | -5.335885 | -3.306150 | -2.608684 |
| C | -6.063361 | -2.873086 | -3.680430 |
| C | -6.730217 | -2.640117 | 3.661172  |

|   |            |           |           |
|---|------------|-----------|-----------|
| C | -7.479150  | -3.000716 | -3.550956 |
| O | -7.916704  | -3.540312 | -2.369844 |
| O | -7.392939  | -3.303813 | 2.661915  |
| C | -9.327496  | -3.586670 | -2.134566 |
| C | -8.821027  | -3.366363 | 2.727110  |
| C | -9.563378  | -4.183274 | -0.759448 |
| O | -8.869425  | -3.466211 | 0.274487  |
| C | -9.324435  | -4.085227 | 1.488796  |
| C | -4.556353  | -1.838883 | 4.449037  |
| C | -7.334979  | -2.093621 | 4.802753  |
| C | -5.176379  | -1.297629 | 5.591849  |
| C | -5.520067  | -2.319997 | -4.849682 |
| C | -8.309656  | -2.575274 | -4.598441 |
| C | -6.365697  | -1.900682 | -5.895128 |
| C | -11.020876 | -4.274629 | -0.257795 |
| C | -10.853981 | -4.204931 | 1.309916  |
| C | -7.751920  | -2.028488 | -5.771008 |
| C | -6.556863  | -1.425736 | 5.768573  |
| C | -12.101987 | -3.193979 | -0.545251 |
| C | -11.856922 | -3.089131 | 1.718895  |
| C | -11.716350 | -1.698570 | -0.308126 |
| C | -11.540960 | -1.625272 | 1.267902  |
| C | -1.721903  | -4.120946 | 0.356521  |
| C | -12.992771 | -3.402894 | 0.708845  |
| C | -1.886349  | -4.185262 | -1.211914 |
| C | -0.486235  | -3.193011 | 0.546045  |
| C | -0.730429  | -3.278903 | -1.726465 |
| C | -0.660904  | -1.707830 | 0.160900  |
| C | -0.838756  | -1.767894 | -1.423280 |
| C | 0.352710   | -3.657324 | -0.677902 |
| O | -1.675280  | -1.025254 | 0.851534  |
| O | -1.997004  | -1.141791 | -1.917105 |
| O | -10.702918 | -1.127876 | -1.094225 |
| O | -10.381811 | -1.000497 | 1.755800  |
| K | -6.437711  | -2.358124 | -0.026007 |
| F | -8.351457  | -0.542146 | 0.045842  |
| H | -3.021255  | -2.015566 | 2.011838  |
| H | -2.878052  | -3.557261 | 2.959913  |
| H | -3.649706  | -4.831391 | 0.982846  |
| H | -3.891844  | -4.937904 | -1.358660 |
| H | -3.526939  | -2.229721 | -2.743044 |
| H | -3.547006  | -3.852147 | -3.558443 |
| H | -9.769054  | -2.572172 | -2.206735 |
| H | -9.821650  | -4.250072 | -2.881955 |
| H | -9.254660  | -2.347738 | 2.790016  |
| H | -9.142443  | -3.954829 | 3.617916  |
| H | -9.149093  | -5.223489 | -0.768689 |
| H | -8.905962  | -5.124016 | 1.505281  |
| H | -3.474351  | -1.716462 | 4.304600  |
| H | -8.421006  | -2.177505 | 4.944526  |
| H | -4.563847  | -0.768521 | 6.337039  |
| H | -4.432488  | -2.195085 | -4.945364 |
| H | -9.400484  | -2.660102 | -4.504276 |
| H | -5.922507  | -1.465668 | -6.803312 |
| H | -11.443162 | -5.251799 | -0.570980 |
| H | -11.195559 | -5.145324 | 1.790034  |
| H | -8.418050  | -1.697391 | -6.581636 |
| H | -7.048070  | -1.002074 | 6.657148  |

|   |            |           |           |
|---|------------|-----------|-----------|
| H | -12.604886 | -3.343033 | -1.521689 |
| H | -12.137696 | -3.140777 | 2.789658  |
| H | -12.638743 | -1.130672 | -0.566852 |
| H | -12.385830 | -1.022850 | 1.671483  |
| H | -1.430130  | -5.113155 | 0.758353  |
| H | -13.846483 | -2.696665 | 0.768294  |
| H | -13.389909 | -4.434337 | 0.799281  |
| H | -1.669300  | -5.207848 | -1.585002 |
| H | -0.004744  | -3.324228 | 1.535658  |
| H | -0.469391  | -3.486777 | -2.783412 |
| H | 0.318826   | -1.213435 | 0.369960  |
| H | 0.058064   | -1.286507 | -1.881224 |
| H | 1.299196   | -3.092539 | -0.799242 |
| H | 0.591490   | -4.740114 | -0.663868 |
| H | -1.737564  | -0.119146 | 0.444053  |
| H | -1.987440  | -0.211370 | -1.568859 |
| H | -9.827899  | -1.024033 | -0.625587 |
| H | -9.634226  | -0.951390 | 1.098251  |
| C | -6.293341  | 4.048261  | 1.834545  |
| C | -6.731668  | 4.631361  | 0.507869  |
| O | -4.856454  | 4.076957  | 1.830970  |
| O | -6.249738  | 3.823374  | -0.571689 |
| C | -6.853728  | 4.386364  | -1.741705 |
| C | -4.182860  | 3.677196  | 2.949779  |
| C | -6.549705  | 3.533249  | -2.955677 |
| O | -5.120675  | 3.555989  | -3.112189 |
| C | -4.564997  | 3.013981  | -4.236196 |
| C | -2.761563  | 3.790199  | 2.881641  |
| C | -3.152418  | 3.177976  | -4.358568 |
| O | -2.545910  | 3.862511  | -3.338225 |
| O | -2.264686  | 4.284677  | 1.703580  |
| C | -1.116702  | 3.938724  | -3.337814 |
| C | -0.844327  | 4.312890  | 1.532098  |
| C | -0.676142  | 4.698996  | -2.100192 |
| O | -1.186346  | 4.118523  | -0.889421 |
| C | -0.542670  | 4.869015  | 0.153155  |
| C | -4.783555  | 3.166257  | 4.110300  |
| C | -1.983455  | 3.393561  | 3.979288  |
| C | -3.990316  | 2.773374  | 5.205707  |
| C | -5.273007  | 2.320006  | -5.228330 |
| C | -2.490114  | 2.645968  | -5.474975 |
| C | -4.595978  | 1.797901  | -6.347589 |
| C | 0.843484   | 4.832244  | -1.853508 |
| C | 0.936192   | 4.950932  | -0.283053 |
| C | -3.213290  | 1.960199  | -6.470416 |
| C | -2.598826  | 2.888188  | 5.141535  |
| C | 1.870446   | 3.710884  | -2.180459 |
| C | 2.006164   | 3.885620  | 0.088348  |
| C | 1.540869   | 2.259394  | -1.700907 |
| C | 1.638218   | 2.381956  | -0.120929 |
| C | -8.233063  | 4.870704  | 0.216222  |
| C | 2.955548   | 4.061501  | -1.127321 |
| C | -8.317961  | 4.697494  | -1.350566 |
| C | -9.418562  | 4.004451  | 0.732524  |
| C | -9.537906  | 3.749100  | -1.536830 |
| C | -9.299793  | 2.475133  | 0.549878  |
| C | -9.379494  | 2.297375  | -1.033563 |
| C | -10.442704 | 4.299836  | -0.399108 |

|   |            |          |           |
|---|------------|----------|-----------|
| O | -8.182681  | 1.884559 | 1.163647  |
| O | -8.318660  | 1.577380 | -1.609122 |
| O | 0.409771   | 1.612329 | -2.224354 |
| O | 0.588154   | 1.831785 | 0.630940  |
| K | -3.617589  | 3.010454 | -0.640371 |
| F | -1.702118  | 1.201683 | -0.621553 |
| H | -6.675961  | 3.013879 | 1.945053  |
| H | -6.683871  | 4.681460 | 2.662582  |
| H | -6.235334  | 5.632600 | 0.417968  |
| H | -6.364060  | 5.379059 | -1.921630 |
| H | -6.923213  | 2.499778 | -2.808028 |
| H | -7.037564  | 3.984306 | -3.848780 |
| H | -0.673226  | 2.922638 | -3.352079 |
| H | -0.758684  | 4.504869 | -4.229009 |
| H | -0.415638  | 3.297030 | 1.652931  |
| H | -0.378379  | 4.993053 | 2.282330  |
| H | -1.095638  | 5.735281 | -2.170867 |
| H | -0.959737  | 5.907692 | 0.112183  |
| H | -5.875467  | 3.053053 | 4.159071  |
| H | -0.888665  | 3.467180 | 3.932562  |
| H | -4.477457  | 2.367540 | 6.104887  |
| H | -6.355347  | 2.164363 | -5.123274 |
| H | -1.402066  | 2.757194 | -5.575032 |
| H | -5.166030  | 1.256525 | -7.117453 |
| H | 1.202044   | 5.759815 | -2.345757 |
| H | 1.340751   | 5.939175 | 0.018835  |
| H | -2.677817  | 1.550055 | -7.339589 |
| H | -1.973123  | 2.577738 | 5.991563  |
| H | 2.201731   | 3.731731 | -3.237689 |
| H | 2.459824   | 4.068106 | 1.082988  |
| H | 2.407517   | 1.650083 | -2.044028 |
| H | 2.548200   | 1.826657 | 0.201256  |
| H | -8.463814  | 5.917238 | 0.505024  |
| H | 3.814086   | 3.358418 | -1.123899 |
| H | 3.352819   | 5.091761 | -1.229912 |
| H | -8.593126  | 5.657739 | -1.833891 |
| H | -9.737051  | 4.290171 | 1.754788  |
| H | -9.964478  | 3.803689 | -2.558341 |
| H | -10.229070 | 2.034168 | 0.983712  |
| H | -10.340904 | 1.777540 | -1.264347 |
| H | -11.394520 | 3.742004 | -0.287156 |
| H | -10.680826 | 5.377276 | -0.508267 |
| H | -8.171963  | 0.929767 | 0.882231  |
| H | -8.266275  | 0.711002 | -1.123838 |
| H | -0.370942  | 1.582455 | -1.603712 |
| H | -0.258631  | 1.704796 | 0.119845  |

TS1-(KF-DB18C6-4OH) 2

180

Coordinates from ORCA-job geom-pbe

|   |                   |                   |                   |
|---|-------------------|-------------------|-------------------|
| C | -0.42812175398039 | -4.90122921363106 | -0.65382418161665 |
| C | -0.27426471202354 | -5.52413480438017 | -2.02518885405933 |
| O | -1.14049866144383 | -5.84169205406028 | 0.16614082429856  |
| O | -1.55204464459688 | -5.81533691470496 | -2.61199857092091 |
| C | -1.23315703531659 | -6.27383529409150 | -3.93309608681837 |
| C | -1.37766052440119 | -5.50393942374967 | 1.47431537599525  |

|   |                   |                    |                   |
|---|-------------------|--------------------|-------------------|
| C | -2.48689082075458 | -6.49278048263759  | -4.75279645179918 |
| O | -3.26992491467559 | -7.48568465660257  | -4.07076710333126 |
| C | -4.41983980053972 | -7.93107411443937  | -4.66597510680343 |
| C | -2.14349655994439 | -6.44150910324744  | 2.22832506212417  |
| C | -5.16369648578799 | -8.90215413968078  | -3.93128517545533 |
| O | -4.63584207760405 | -9.27339889978808  | -2.72018477679163 |
| O | -2.55350005999997 | -7.56619679471603  | 1.55229018277660  |
| C | -5.41761725529034 | -10.14744085829642 | -1.89782229606123 |
| C | -3.40725492917792 | -8.48204642712025  | 2.24533772483073  |
| C | -4.66414953450863 | -10.39645426343501 | -0.60508171540087 |
| O | -4.31663138697665 | -9.17707682016313  | 0.07220540957607  |
| C | -3.74079325864290 | -9.62886837428698  | 1.30872057429577  |
| C | -0.93299613899869 | -4.32132961292809  | 2.08513385726373  |
| C | -2.44000294668428 | -6.16975093867244  | 3.57297408735279  |
| C | -1.23853488017196 | -4.06252303353487  | 3.43470113235488  |
| C | -4.89598935899281 | -7.49083968131902  | -5.91043077792693 |
| C | -6.36077550739036 | -9.40230749802725  | -4.46634901421683 |
| C | -6.09522049529125 | -8.00619862894392  | -6.43777527848763 |
| C | -5.36146234530075 | -11.25212580504719 | 0.47667454678415  |
| C | -4.72179347348450 | -10.70817275558677 | 1.81370133277253  |
| C | -6.82412543866468 | -8.95699058435066  | -5.71914521522774 |
| C | -1.98704726909352 | -4.98071458857481  | 4.17592433830890  |
| C | -6.88916453212798 | -11.19354274753358 | 0.76879048251434  |
| C | -5.96405353223995 | -10.39238089731996 | 2.69298838763977  |
| C | -7.55124353532930 | -9.78446912312572  | 0.90937224851054  |
| C | -6.89406386425550 | -9.22101609683683  | 2.23983243497344  |
| C | 0.51940553133566  | -4.77416691523527  | -3.12246254833864 |
| C | -6.86643972611993 | -11.58342869524456 | 2.27127384319250  |
| C | -0.14841883070484 | -5.30093776952747  | -4.45305016578120 |
| C | 0.54890541608003  | -3.23172766652566  | -3.32530733005318 |
| C | -0.42533445618439 | -3.99517865232456  | -5.25005107352508 |
| C | -0.82377296830774 | -2.50237203779817  | -3.34243092291668 |
| C | -1.49602264785745 | -3.02799690265539  | -4.67211482049361 |
| C | 0.84480576120180  | -3.19163370670203  | -4.85067392919229 |
| O | -1.71715604526700 | -2.69819181451961  | -2.27284811138126 |
| O | -2.78929085102683 | -3.53182691059408  | -4.42891813922561 |
| O | -7.57817157559075 | -8.93327965169293  | -0.20812209160789 |
| O | -6.37484870505984 | -7.91395558002964  | 2.19166379665277  |
| K | -3.54507515896123 | -6.94484609356117  | -1.18597404235566 |
| H | -0.98426515024435 | -3.94750193696482  | -0.71591874443871 |
| H | 0.58356594517561  | -4.70820177430613  | -0.23205172030952 |
| H | 0.24660999123017  | -6.50542294644140  | -1.87707906483194 |
| H | -0.73677600845359 | -7.27285190635735  | -3.82456883247825 |
| H | -3.05359961682497 | -5.54463504864357  | -4.85534171775947 |
| H | -2.19143939149007 | -6.86477656119303  | -5.76013118956303 |
| H | -6.41302694210359 | -9.70242528445986  | -1.69497909938567 |
| H | -5.55564807524698 | -11.13181118056611 | -2.40260047221937 |
| H | -4.32732254710627 | -7.96788621829339  | 2.59087134814938  |
| H | -2.87892646869062 | -8.90984610010670  | 3.12874696777860  |
| H | -3.70337680103653 | -10.90976189399881 | -0.86579494372661 |
| H | -2.77975581324267 | -10.14445245351825 | 1.05426029710293  |
| H | -0.35651130736180 | -3.57308264948299  | 1.52327478969989  |
| H | -3.03930281363457 | -6.87950936847231  | 4.15841569904966  |
| H | -0.88772161717125 | -3.12249157038505  | 3.88446039776946  |
| H | -4.34044079069589 | -6.72772110845294  | -6.47096744294518 |
| H | -6.94922223987232 | -10.13856646446146 | -3.90340076654188 |
| H | -6.45446657403807 | -7.64550489625382  | -7.41222089286575 |
| H | -5.09712235888307 | -12.31761542168686 | 0.31335635625246  |



|   |                   |                    |                   |
|---|-------------------|--------------------|-------------------|
| H | -4.14353663971427 | -11.50139074174091 | 2.33064112780826  |
| H | -7.76768850634510 | -9.35658356815859  | -6.11775582744823 |
| H | -2.23930904914457 | -4.77989704711599  | 5.22772224361619  |
| H | -7.47500411264741 | -11.86302151755292 | 0.10793966124194  |
| H | -5.71874837291695 | -10.33511902929535 | 3.77225843495218  |
| H | -8.61957381088256 | -10.00238089893324 | 1.13319220222121  |
| H | -7.69034114176102 | -9.17539345521171  | 3.01546655177353  |
| H | 1.57660936017178  | -5.10504481121140  | -3.05852054224619 |
| H | -7.86800476474011 | -11.57029223521809 | 2.74681820064695  |
| H | -6.40383335695488 | -12.57258656997981 | 2.46217551205384  |
| H | 0.57785335158743  | -5.89167436307843  | -5.04874552692287 |
| H | 1.28436469123517  | -2.72057831965712  | -2.67295643328657 |
| H | -0.55271519086754 | -4.17688407904060  | -6.33603962181554 |
| H | -0.60648950606372 | -1.41571965852002  | -3.44730871709484 |
| H | -1.58236149075250 | -2.18548763359816  | -5.39729395338041 |
| H | 0.86066930419932  | -2.16417705569951  | -5.26788612186308 |
| H | 1.79097838363022  | -3.69746983125674  | -5.13083806924803 |
| H | -1.50267455064279 | -2.03826478792715  | -1.52768011872247 |
| H | -2.92230255865406 | -3.37564940025556  | -3.45975087411114 |
| H | -6.92469613892489 | -8.18336352310991  | -0.17147318451857 |
| H | -6.09238593865009 | -7.62507743334862  | 1.28452069385706  |
| C | -6.31190804005030 | 1.40760286600234   | 1.53147147463260  |
| C | -6.30609677130200 | 2.28584803180461   | 0.29744667735353  |
| O | -4.95029664104780 | 1.32006754013852   | 1.98048512185030  |
| O | -5.49851487570398 | 1.69879583083020   | -0.72906378069169 |
| C | -5.70764212890629 | 2.53445705414568   | -1.87262052183112 |
| C | -4.67836612463815 | 0.60479230768373   | 3.11246055898634  |
| C | -5.01931459850460 | 1.95433987740388   | -3.09162065019449 |
| O | -3.61243883608459 | 1.94701285016598   | -2.79411130157202 |
| C | -2.72468817494275 | 1.64752414495278   | -3.78754988058398 |
| C | -3.30170529622085 | 0.54089495142619   | 3.48258928403944  |
| C | -1.34637116492069 | 1.77035101563514   | -3.43707058680406 |
| O | -1.09026181772866 | 2.16940073548612   | -2.15296586134137 |
| O | -2.43657124885329 | 1.20758127410197   | 2.65479687323323  |
| C | 0.26197072993958  | 2.09152037763141   | -1.69221916302125 |
| C | -1.03449052462957 | 1.10194266210353   | 2.91781536449267  |
| C | 0.29875613746207  | 2.43345546558016   | -0.21446817429220 |
| O | -0.59642657094319 | 1.62249508860824   | 0.55966401251512  |
| C | -0.29535741702517 | 1.97098932128257   | 1.91843002225015  |
| C | -5.63756651325201 | -0.05217703768891  | 3.89798631993991  |
| C | -2.92591884070494 | -0.17810242475070  | 4.62707793095429  |
| C | -5.24736261237278 | -0.76602682648774  | 5.04743892896906  |
| C | -3.07823206768680 | 1.22591157628197   | -5.07800790291848 |
| C | -0.36348369679150 | 1.48037699694936   | -4.39661034280172 |
| C | -2.08216824740500 | 0.94013011548906   | -6.03130301613221 |
| C | 1.66368648571422  | 2.30765777224649   | 0.50479250190590  |
| C | 1.24419410671179  | 1.96827493667472   | 1.98676555829872  |
| C | -0.73153552203743 | 1.06991314006509   | -5.69358250300057 |
| C | -3.89929436034780 | -0.82866451804870  | 5.41009421005521  |
| C | 2.72305442208387  | 1.21265321487120   | 0.18049781043328  |
| C | 2.08498373219007  | 0.70156865481809   | 2.30949675889739  |
| C | 2.24205970619050  | -0.26920812212642  | 0.05101528221516  |
| C | 1.75655225029020  | -0.61292804662864  | 1.52456287166046  |
| C | -7.64258159434953 | 2.66556635359875   | -0.38832062875143 |
| C | 3.39430036908780  | 1.09949060062062   | 1.57648818945916  |
| C | -7.22555119924367 | 2.83051739955253   | -1.90082096984964 |
| C | -8.92056571866257 | 1.77859098222617   | -0.46851795713470 |
| C | -8.30770822474849 | 2.00914485151324   | -2.66005205529327 |

|    |                    |                   |                   |
|----|--------------------|-------------------|-------------------|
| C  | -8.73633832099028  | 0.31678791651871  | -0.93285105455499 |
| C  | -8.29226543581478  | 0.47787990905515  | -2.45638629716408 |
| C  | -9.53446542593066  | 2.36158019599758  | -1.77314078397700 |
| O  | -7.88182722340027  | -0.45934130322087 | -0.13128885421550 |
| O  | -7.07926655418965  | -0.14427327309675 | -2.80295591143259 |
| O  | 1.39486527577127   | -0.62892269068092 | -1.00724645039334 |
| O  | 0.47881814496704   | -1.18377488170009 | 1.66275045541993  |
| K  | -3.00014323515628  | 0.68381168099096  | -0.21866983906444 |
| F  | -1.12305182741732  | -1.06121189683915 | -0.44859667779682 |
| H  | -6.71554798079001  | 0.40484827016312  | 1.28624035654315  |
| H  | -6.94421142961868  | 1.88419418020570  | 2.31502479519024  |
| H  | -5.82011008019996  | 3.25369841755259  | 0.58767803987615  |
| H  | -5.20557661358493  | 3.51512723761425  | -1.66392276952701 |
| H  | -5.39053039808817  | 0.93120544679407  | -3.30003203164067 |
| H  | -5.21851627314163  | 2.61034873279420  | -3.96830253383593 |
| H  | 0.67177711301683   | 1.07724340252041  | -1.87292246557653 |
| H  | 0.89734893989592   | 2.83596381350165  | -2.22635081338983 |
| H  | -0.70330813129900  | 0.04483730403556  | 2.84385884838662  |
| H  | -0.80346152087028  | 1.48881174896778  | 3.93738556122582  |
| H  | -0.03829408277230  | 3.49552035596708  | -0.10059098527007 |
| H  | -0.63680642594838  | 3.02676646214114  | 2.07239678638581  |
| H  | -6.69644676469487  | -0.01846074099716 | 3.60891739156794  |
| H  | -1.86747671359989  | -0.24120828536279 | 4.91422734018244  |
| H  | -6.01199382730584  | -1.27724858797174 | 5.65046887345272  |
| H  | -4.13712561962416  | 1.09865176374783  | -5.34116821890543 |
| H  | 0.69940057098057   | 1.57169336153400  | -4.13763202671333 |
| H  | -2.37847505526488  | 0.60909164944310  | -7.03751588116150 |
| H  | 2.18028044576570   | 3.28816917137218  | 0.45237898435253  |
| H  | 1.57169235599990   | 2.76500708162339  | 2.68621422662708  |
| H  | 0.05279442898505   | 0.85313714119358  | -6.43439442654162 |
| H  | -3.58614216509877  | -1.38756713683370 | 6.30418559909447  |
| H  | 3.39451591857326   | 1.50359388095414  | -0.65173658718185 |
| H  | 2.18134254665768   | 0.52167543203183  | 3.39904491195400  |
| H  | 3.18123821976424   | -0.84104376301089 | -0.12450486171804 |
| H  | 2.45945461197059   | -1.36984243310800 | 1.94064844698656  |
| H  | -7.96645784610853  | 3.63866913544963  | 0.03454992812767  |
| H  | 4.18525505939183   | 0.32267292798056  | 1.62472877094126  |
| H  | 3.82323166476900   | 2.05530221513267  | 1.93928407056266  |
| H  | -7.35353193834660  | 3.88370652935947  | -2.22592096798893 |
| H  | -9.55248651283888  | 1.86170717492787  | 0.43778564990593  |
| H  | -8.38755701918778  | 2.29836709609085  | -3.72705206920241 |
| H  | -9.75431715736457  | -0.14160377190593 | -0.93082858671127 |
| H  | -9.11154467321533  | 0.06598980415542  | -3.09161760435840 |
| H  | -10.46777380565472 | 1.85076472020855  | -2.08586449579969 |
| H  | -9.73490846981777  | 3.45018017153761  | -1.71544583303629 |
| H  | -7.89080010450698  | -1.38100598049370 | -0.49971581764237 |
| H  | -7.19355382746562  | -1.11985823349243 | -2.68756753240589 |
| H  | 0.42775188400974   | -0.72432129892026 | -0.75100139287829 |
| H  | -0.12777305413406  | -1.03851492592198 | 0.87973072449454  |
| H  | -9.08954678230589  | -5.55993782433965 | 0.13852422047068  |
| H  | -7.31454029350445  | -5.73298649000034 | -1.60169016099841 |
| H  | -7.74067061936382  | -6.00732555460969 | 1.23706829158770  |
| C  | -8.07975987926025  | -5.26772640625531 | 0.48059300475873  |
| Br | -8.11396144155761  | -3.19827477037982 | -1.93154083514567 |
| C  | -7.10183444248004  | -5.24131886280502 | -0.64747129236181 |
| F  | -5.98740636068866  | -6.76817555804803 | -0.21449954249969 |
| H  | -8.13742770182301  | -4.28330728579335 | 0.98192368777872  |
| H  | -6.21060264797619  | -4.60706561873649 | -0.59731228939081 |
